# Supplementary material for: A new paradigm for designing ring construction strategies for green organic synthesis: implications for the discovery of multicomponent reactions to build molecules containing a single ring
Source: PubMed Central journal article supplement (PMC5238618; doi:10.3762/bjoc.12.236), 2016-11-16
Supplement: Beilstein_J_Org_Chem-12-2420-s001.pdf [file Beilstein_J_Org_Chem-12-2420-s001.pdf]

**Supporting Information**  
**for**  
**A new paradigm for designing ring construction**  
**strategies for green organic synthesis: implications for**  
**the discovery of multicomponent reactions to build**  
**molecules containing a single ring**

John Andraos

Address: CareerChem, 504-1129 Don Mills Road, Toronto, ON M3B 2W4 Canada

Email: John Andraos - c1000@careerchem.com

\*Corresponding author

**Application of integer partitioning algorithm to monocyclic rings**

Contents

Table S1. Ladder pattern for determining the total number of 3-partitions of even-membered monocyclic rings

Table S2. Ladder pattern for determining the total number of 3-partitions of odd-membered monocyclic rings

Table S3. Ladder pattern for determining the total number of 4-partitions of even-membered monocyclic rings

Table S4. Ladder pattern for determining the total number of 4-partitions of odd-membered monocyclic rings

Enumeration of 3-partitions of monocyclic rings

Enumeration of 4-partitions of monocyclic rings

Schemes S1 to S3 showing three-component coupling strategies to synthesize cyclohexanone.

Figure S1. Nucleophilic-electrophilic labelling of centres in 3-partition fragments of cyclohexanone.

Figure S2. Nucleophilic-electrophilic labelling of centres in 2-partition fragments of piperidine.

Figure S3. Nucleophilic-electrophilic labelling of centres in 3-partition fragments of piperidine.

Figure S4. Nucleophilic-electrophilic labelling of centres in 2-partition fragments of cyclopentanone.

Figure S5. Nucleophilic-electrophilic labelling of centres in 3-partition fragments of cyclopentanone.

Figure S6. Nucleophilic-electrophilic labelling of centres in 2-partition fragments of pyrrolidine.

Figure S7. Nucleophilic-electrophilic labelling of centres in 3-partition fragments of pyrrolidine.

Schemes S4 to S5 showing new three-component coupling strategies to synthesize the Biginelli adduct.

Schemes S6 to S32 showing superposition of 3-partition templates for various heterocycles.

Table S1. Ladder pattern for determining the total number of 3-partitions of even-membered monocyclic rings

| Number of 3-partitions |    | Ring size |    |
|------------------------|----|-----------|----|
| 1                      | 4  | 1         |    |
| 3                      | 6  | 3         |    |
| 5                      | 8  | 5         |    |
| 8                      | 10 | 7         | 1  |
| 12                     | 12 | 9         | 3  |
| 16                     | 14 | 11        | 5  |
| 21                     | 16 | 13        | 7  |
| 27                     | 18 | 15        | 9  |
| 33                     | 20 | 17        | 11 |
| 40                     | 22 | 19        | 13 |
| 48                     | 24 | 21        | 15 |
| 56                     | 26 | 23        | 17 |
| 65                     | 28 | 25        | 19 |
| 75                     | 30 | 27        | 21 |
| 85                     | 32 | 29        | 23 |

Generating sequence:

$$1, 3, 5, 7, \dots, (r-3)$$

where  $r$  is the ring size ( $r = 4, 6, 8, 10, \dots$ ).

*Example:*

A 16-membered ring has  $13 + 7 + 1 = 21$  possible three-partitions.

Table S2. Ladder pattern for determining the total number of 3-partitions of odd-membered monocyclic rings

| Number of 3-partitions |    | Ring size |    |
|------------------------|----|-----------|----|
| 1                      | 3  | 1         |    |
| 2                      | 5  | 2         |    |
| 4                      | 7  | 4         |    |
| 7                      | 9  | 6         | 1  |
| 10                     | 11 | 8         | 2  |
| 14                     | 13 | 10        | 4  |
| 19                     | 15 | 12        | 6  |
| 24                     | 17 | 14        | 8  |
| 30                     | 19 | 16        | 10 |
| 37                     | 21 | 18        | 12 |
| 44                     | 23 | 20        | 14 |
| 52                     | 25 | 22        | 16 |
| 61                     | 27 | 24        | 18 |
| 70                     | 29 | 26        | 20 |
| 80                     | 31 | 28        | 22 |

Generating sequence:

$$2, 4, 6, 8, \dots, (r-3)$$

where  $r$  is the ring size ( $r = 5, 7, 9, 11, \dots$ ).

Note that for  $r = 3$  the sequence term is 1.

*Example:*

A 15-membered ring has  $12 + 6 + 1 = 19$  possible three-partitions.

Table S3. Ladder pattern for determining the total number of 4-partitions of even-membered monocyclic rings

| Number of 4-partitions |    | Ring size     |
|------------------------|----|---------------|
| 1                      | 4  | 1             |
| 3                      | 6  | 3             |
| 8                      | 8  | 7 1           |
| 16                     | 10 | 13 3          |
| 29                     | 12 | 21 7 1        |
| 47                     | 14 | 31 13 3       |
| 72                     | 16 | 43 21 7 1     |
| 104                    | 18 | 57 31 13 3    |
| 145                    | 20 | 73 43 21 7 1  |
| 195                    | 22 | 91 57 31 13 3 |

Generating sequence:

$$1, 3, 7, 13, 21, \dots, \left( \frac{r^2}{4} - \frac{3}{2}r + 3 \right),$$

where  $r$  is the ring size ( $r = 4, 6, 8, 10, \dots$ ).

*Example:*

A 12-membered ring has  $21 + 7 + 1 = 29$  possible four-partitions.

Table S4. Ladder pattern for determining the total number of 4-partitions of odd-membered monocyclic rings

| Number of 4-partitions |    | Ring size |     |
|------------------------|----|-----------|-----|
| 0                      | 3  | 0         |     |
| 1                      | 5  | 1         |     |
| 4                      | 7  | 4         |     |
| 10                     | 9  | 9         | 1   |
| 20                     | 11 | 16        | 4   |
| 35                     | 13 | 25        | 9   |
| 56                     | 15 | 36        | 16  |
| 84                     | 17 | 49        | 25  |
| 120                    | 19 | 64        | 36  |
| 165                    | 21 | 81        | 49  |
| 220                    | 23 | 100       | 64  |
| 286                    | 25 | 121       | 81  |
| 364                    | 27 | 144       | 100 |

Generating sequence:

$$0, 1, 4, 9, 16, \dots, \left( \frac{r^2}{4} - \frac{3}{2}r + \frac{9}{4} \right),$$

where  $r$  is the ring size ( $r = 3, 5, 7, 9, \dots$ ).

*Example:*

A 15-membered ring has  $36 + 16 + 4 = 56$  possible four-partitions.

### Enumeration of 3-partitions of monocyclic rings:

Step 1: For a given ring size begin with a horizontal list of 2-partitions  $(n, m)$ , where  $n$  is always larger than  $m$ .

Step 2. Under each  $(n, m)$ , write out all 2-partitions of  $n$  in descending order in a column as follows:  $(k, l), m$ , where  $k \geq l$ .

Step 3: The unique 3-partitions in the array are given by  $(k, l, m)$  such that  $k \geq l \geq m$ .

*Example 1:*

For a ring size of 12 we have the following array.

|              |          |         |         |         |         |         |
|--------------|----------|---------|---------|---------|---------|---------|
| 2-partitions | 11,1     | 10,2    | 9,3     | 8,4     | 7,5     | 6,6     |
| 3-partitions | (10,1),1 |         |         |         |         |         |
|              | (9,2),1  | (9,1),2 |         |         |         |         |
|              | (8,3),1  | (8,2),2 | (8,1),3 |         |         |         |
|              | (7,4),1  | (7,3),2 | (7,2),3 | (7,1),4 |         |         |
|              | (6,5),1  | (6,4),2 | (6,3),3 | (6,2),4 | (6,1),5 |         |
|              |          | (5,5),2 | (5,4),3 | (5,3),4 | (5,2),5 | (5,1),6 |
|              |          |         |         | (4,4),4 | (4,3),5 | (4,2),6 |
|              |          |         |         |         |         | (3,3),6 |

The 3-partitions highlighted in yellow are the unique 3-partitions of a 12-membered ring.

Note that partitions of the form  $(a, b, c), (b, c, a), (c, a, b), (c, b, a), (a, c, b)$ , and  $(b, a, c)$  are equivalent due to the inherent cyclic nature of the ring read in clockwise and anti-clockwise senses. For example,  $(9, 2, 1)$  is equivalent to  $(9, 1, 2)$ .

*Example 2:*

For a ring size of 11 we have the following array.

|              |         |         |         |         |         |
|--------------|---------|---------|---------|---------|---------|
| 2-partitions | 10,1    | 9,2     | 8,3     | 7,4     | 6,5     |
| 3-partitions | (9,1),1 |         |         |         |         |
|              | (8,2),1 | (8,1),2 |         |         |         |
|              | (7,3),1 | (7,2),2 | (7,1),3 |         |         |
|              | (6,4),1 | (6,3),2 | (6,2),3 | (6,1),4 |         |
|              | (5,5),1 | (5,4),2 | (5,3),3 | (5,2),4 | (5,1),5 |
|              |         |         | (4,4),3 | (4,3),4 | (4,2),5 |
|              |         |         |         |         | (3,3),5 |

The 3-partitions highlighted in yellow are the unique 3-partitions of an 11-membered ring.

Even-membered rings will always terminate in a 2-partition equal to  $\left(\frac{r}{2}, \frac{r}{2}\right)$ .

Odd-membered rings will always terminate in a 2-partition equal to  $\left(\frac{r+1}{2}, \frac{r-1}{2}\right)$ .

If  $r$  is even and divisible by 3, then

|                                                                                                            |
|------------------------------------------------------------------------------------------------------------|
| $\text{total number of elements in array} = \left\{ \frac{3}{16}r^2 - \frac{1}{4}r - \frac{1}{4} \right\}$ |
| $\text{number of redundancies in array} = \left\{ \frac{5}{48}r^2 - \frac{1}{4}r - \frac{1}{4} \right\}$   |
| $\text{number of unique 3-partitions} = \frac{1}{12}r^2$                                                   |

where  $\{ \}$  denotes the nearest integer.

If  $r$  is even and not divisible by 3, then

|                                                                                                          |
|----------------------------------------------------------------------------------------------------------|
| $\text{total number of elements in array} = \left\{ \frac{3}{16}r^2 - \frac{1}{4}r \right\}$             |
| $\text{number of redundancies in array} = \left\{ \frac{5}{48}r^2 - \frac{1}{4}r + \frac{1}{3} \right\}$ |
| $\text{number of unique 3-partitions} = \frac{1}{12}r^2 - \frac{1}{3}$                                   |

where  $\{ \}$  denotes the nearest integer.

If  $r$  is odd and divisible by 3, then

|                                                                                                              |
|--------------------------------------------------------------------------------------------------------------|
| $\text{total number of elements in array} = \left\{ \frac{3}{16}r^2 - \frac{19}{48}r + \frac{1}{2} \right\}$ |
| $\text{number of redundancies in array} = \left\{ \frac{5}{48}r^2 - \frac{19}{48}r + \frac{1}{4} \right\}$   |
| $\text{number of unique 3-partitions} = \frac{1}{12}r^2 + \frac{1}{4}$                                       |

where  $\{ \}$  denotes the nearest integer.



If  $r$  is odd and not divisible by 3, then

$$\begin{aligned} \text{total number of elements in array} &= \left\{ \frac{9}{48}r^2 - \frac{3}{8}r + \frac{5}{12} \right\} \\ \text{number of redundancies in array} &= \left\{ \frac{5}{48}r^2 - \frac{3}{8}r + \frac{1}{3} \right\} \\ \text{number of unique 3-partitions} &= \frac{1}{12}r^2 - \frac{1}{12} \end{aligned}$$

where  $\{ \}$  denotes the nearest integer.

### Enumeration of 4-partitions of monocyclic rings:

Step 1: For a given ring size begin with a horizontal list of 3-partitions  $(n, m, l)$ , where  $n \geq m \geq l$  as determined by the method of enumeration of 3-partitions described above.

Step 2. Under each  $(n, m, l)$ , write out all 2-partitions of  $n$  in descending order in a column as follows:  $(u, v), m, l$  where  $u \geq v$ .

Step 3: Repeat step 2 for the  $m$  values.

Step 4: Select unique 4-partitions from array. For 4-partitions containing two identical digits, such as  $(x, x, y, z)$ , ensure that the form  $(x, y, x, z)$  is also present in the unique set.

*Example 1:*

For a ring size of 12 we have the following array.

|              |           |           |           |           |           |           |           |           |           |           |           |           |
|--------------|-----------|-----------|-----------|-----------|-----------|-----------|-----------|-----------|-----------|-----------|-----------|-----------|
| 3-partitions | 10,1,1    | 9,2,1     | 8,3,1     | 7,4,1     | 6,5,1     | 8,2,2     | 7,3,2     | 6,4,2     | 5,5,2     | 6,3,3     | 5,4,3     | 4,4,4     |
| 4-partitions | (9,1),1,1 |           |           |           |           |           |           |           |           |           |           |           |
|              | (8,2),1,1 | (8,1),2,1 |           |           |           |           |           |           |           |           |           |           |
|              | (7,3),1,1 | (7,2),2,1 | (7,1),3,1 |           |           | (7,1),2,2 |           |           |           |           |           |           |
|              | (6,4),1,1 | (6,3),2,1 | (6,2),3,1 | (6,1),4,1 |           | (6,2),2,2 | (6,1),3,2 |           |           |           |           |           |
|              | (5,5),1,1 | (5,4),2,1 | (5,3),3,1 | (5,2),4,1 | (5,1),5,1 | (5,3),2,2 | (5,2),3,2 | (5,1),4,2 |           | (5,1),3,3 |           |           |
|              |           |           | (4,4),3,1 | (4,3),4,1 | (4,2),5,1 | (4,4),2,2 | (4,3),3,2 | (4,2),4,2 | (4,1),5,2 | (4,2),3,3 | (4,1),4,3 |           |
|              |           |           |           |           | (3,3),5,1 |           |           | (3,3),4,2 | (3,2),5,2 | (3,3),3,3 | (3,2),4,3 | (3,1),4,4 |
|              |           |           |           |           |           |           |           |           |           |           |           | (2,2),4,4 |
|              |           |           |           |           |           |           | (4,3),2,3 |           |           |           |           |           |
|              |           | 9,(1,1),1 | 8,(2,1),1 | 7,(3,1),1 | 6,(4,1),1 | 8,(1,1),2 | 7,(2,1),2 | 6,(3,1),2 | 5,(4,1),2 | 6,(2,1),3 | 5,(3,1),3 | 4,(3,1),4 |
|              |           |           |           | 7,(2,2),1 | 6,(3,2),1 |           |           | 6,(2,2),2 | 5,(3,2),2 |           | 5,(2,2),3 | 4,(2,2),4 |

The 4-partitions highlighted in yellow are the unique 4-partitions of a 12-membered ring.

*Example 2:*

For a ring size of 11 we have the following array.

|              |           |           |           |           |           |           |           |           |           |           |           |           |           |           |           |
|--------------|-----------|-----------|-----------|-----------|-----------|-----------|-----------|-----------|-----------|-----------|-----------|-----------|-----------|-----------|-----------|
| 3-partitions | 9,1,1     | 8,2,1     | 7,3,1     | 6,4,1     | 5,5,1     | 7,2,2     | 6,3,2     | 5,4,2     | 5,3,3     | 4,4,3     |           |           |           |           |           |
| 4-partitions | (8,1),1,1 | (7,2),1,1 | (7,1),2,1 | (6,3),1,1 | (6,2),2,1 | (6,1),3,1 | (6,1),2,2 | (5,4),1,1 | (5,3),2,1 | (5,2),3,1 | (5,1),4,1 | (5,2),2,2 | (5,1),3,2 |           |           |
|              |           | (4,4),2,1 | (4,3),3,1 | (4,2),4,1 | (4,1),5,1 | (4,3),2,2 | (4,2),3,2 | (4,1),4,2 | (4,1),3,3 | (3,3),4,1 | (3,2),5,1 | (3,3),3,2 | (3,2),4,2 | (3,2),3,3 | (3,1),4,3 |
|              |           |           |           |           |           |           |           |           |           |           |           |           |           |           | (2,2),4,3 |
|              |           | 8,(1,1),1 | 7,(2,1),1 | 6,(3,1),1 | 5,(4,1),1 | 7,(1,1),2 | 6,(2,1),2 | 5,(3,1),2 | 5,(2,1),3 | 4,(3,1),3 |           |           |           |           |           |
|              |           |           |           | 6,(2,2),1 | 5,(3,2),1 |           |           | 5,(2,2),2 |           | 4,(2,2),3 |           |           |           |           |           |

The 4-partitions highlighted in yellow are the unique 4-partitions of an 11-membered ring.

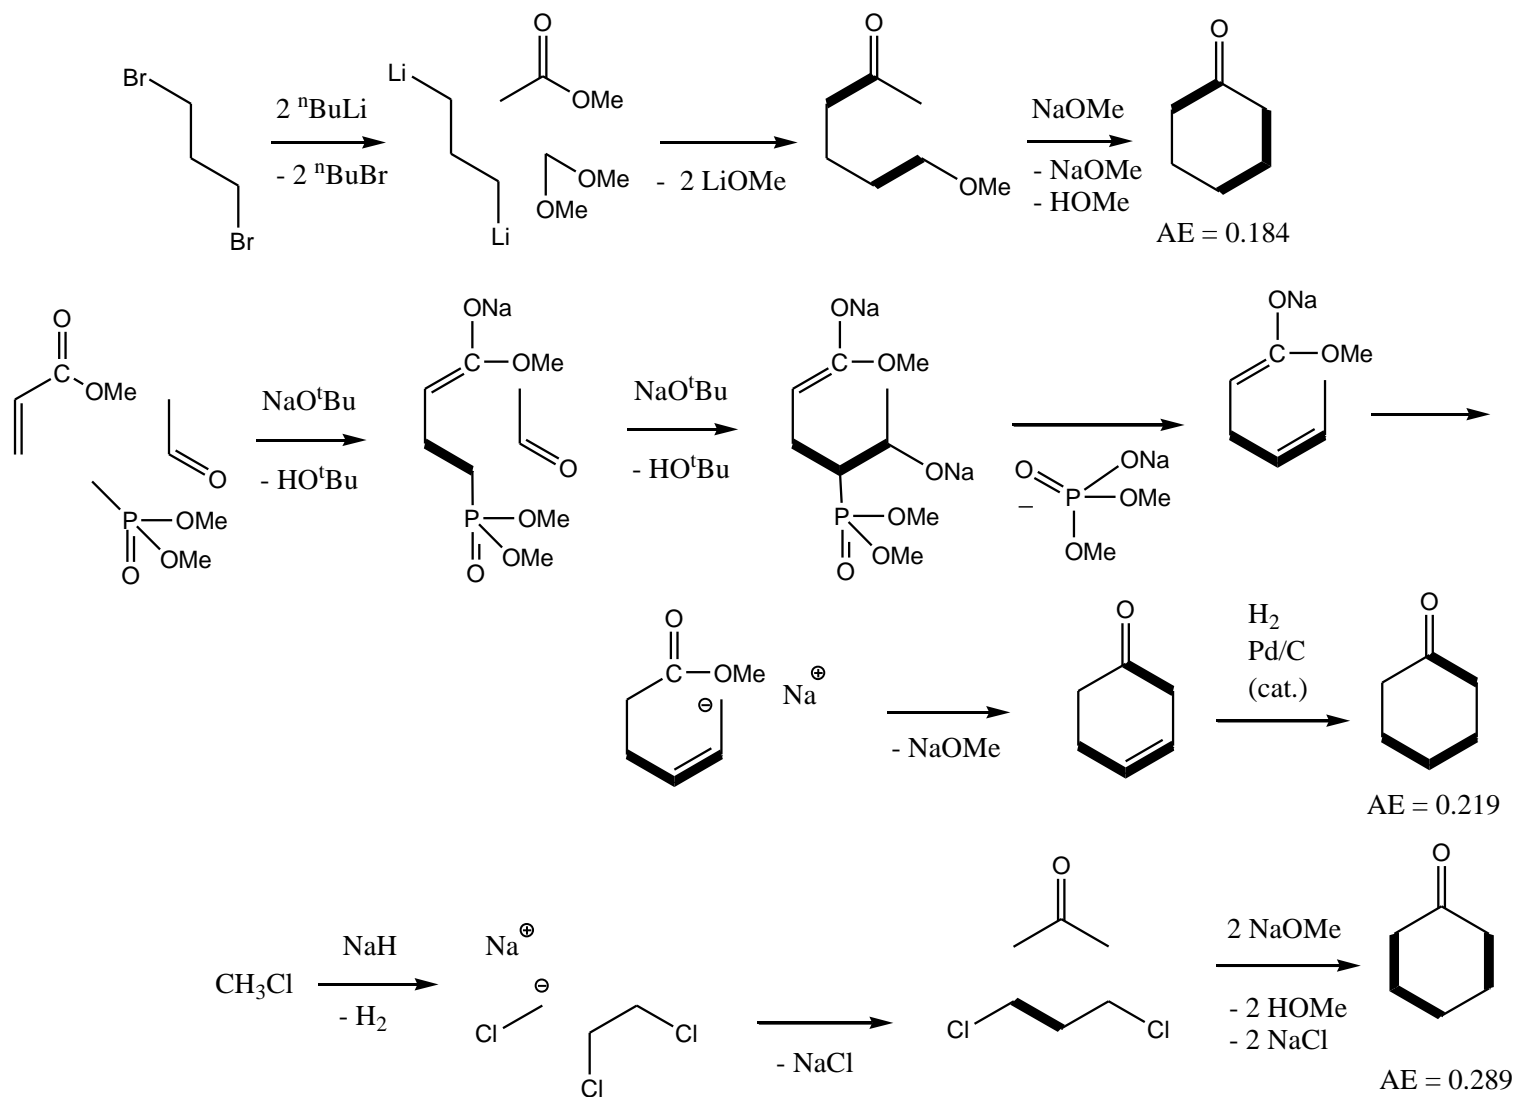

Scheme S1a. Three-component coupling sequences to make cyclohexanone via the [3 + 2 + 1] strategy.

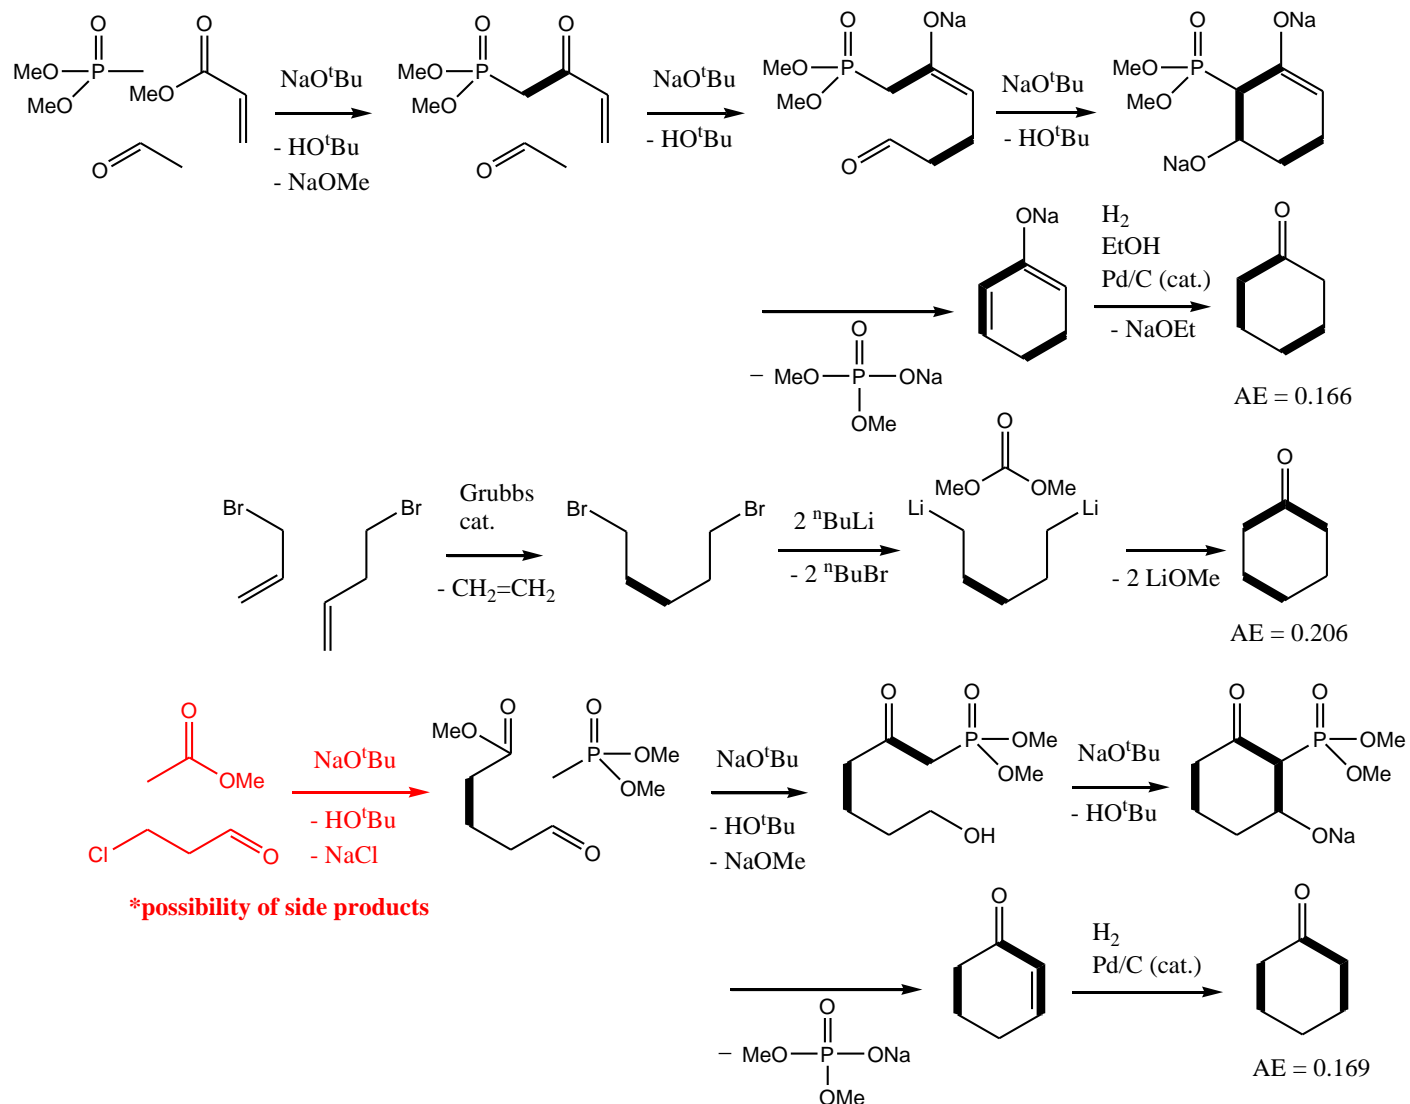

Scheme S1b. Three-component coupling sequences to make cyclohexanone via the [3 + 2 + 1] strategy. (continued)

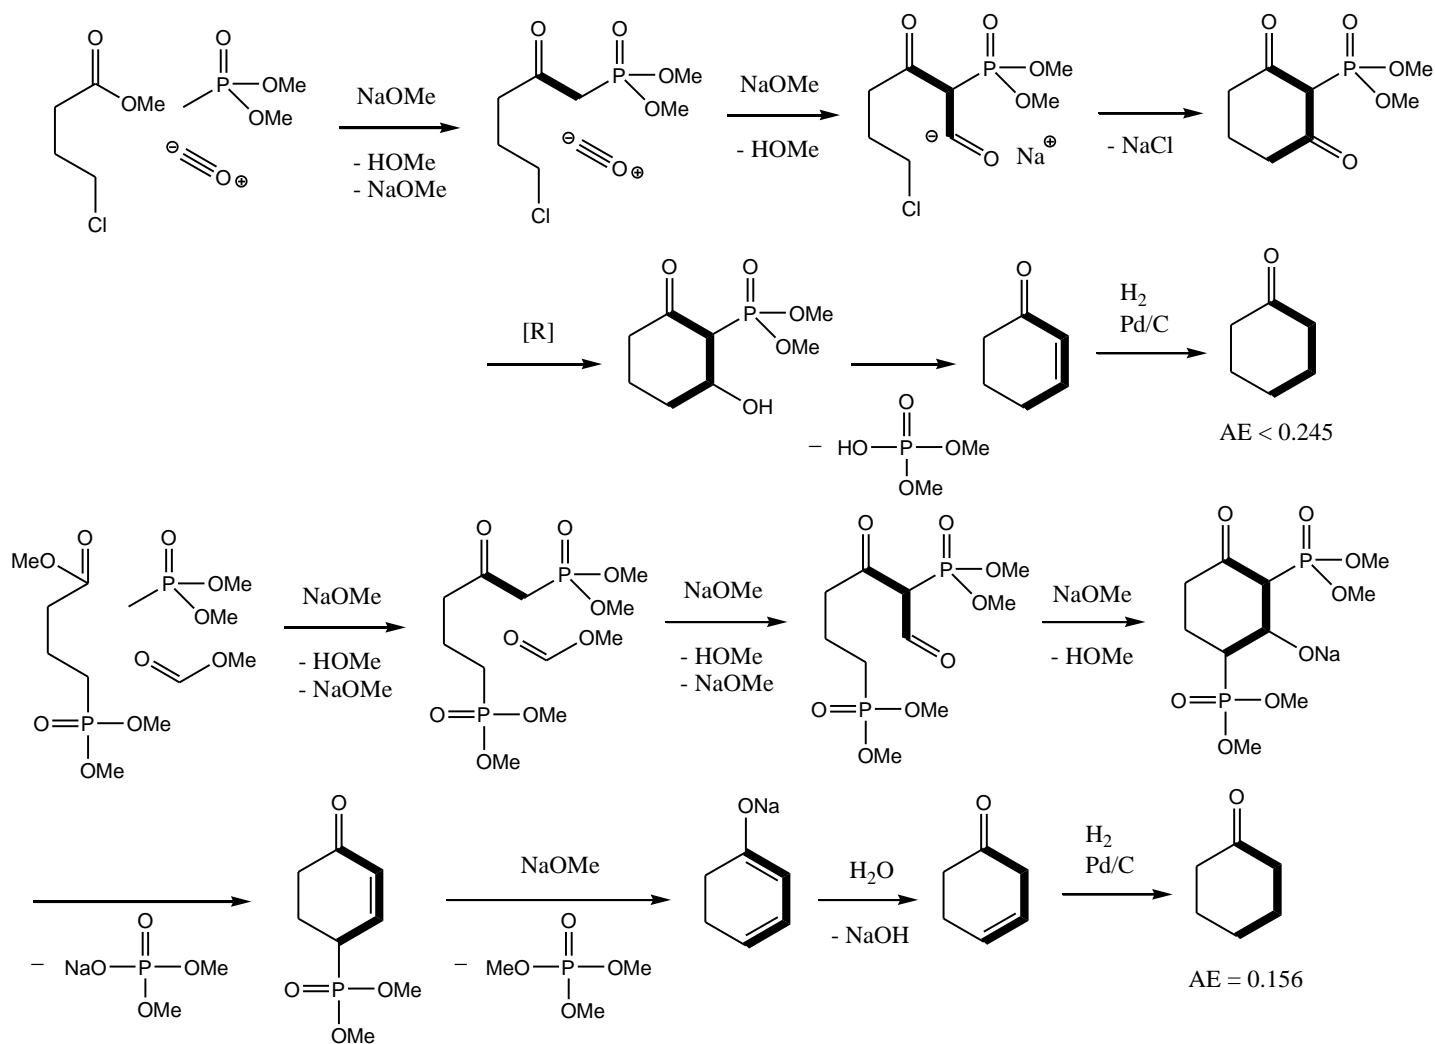

Scheme S2a. Three-component coupling sequences to make cyclohexanone via the [4 + 1 + 1] strategy.

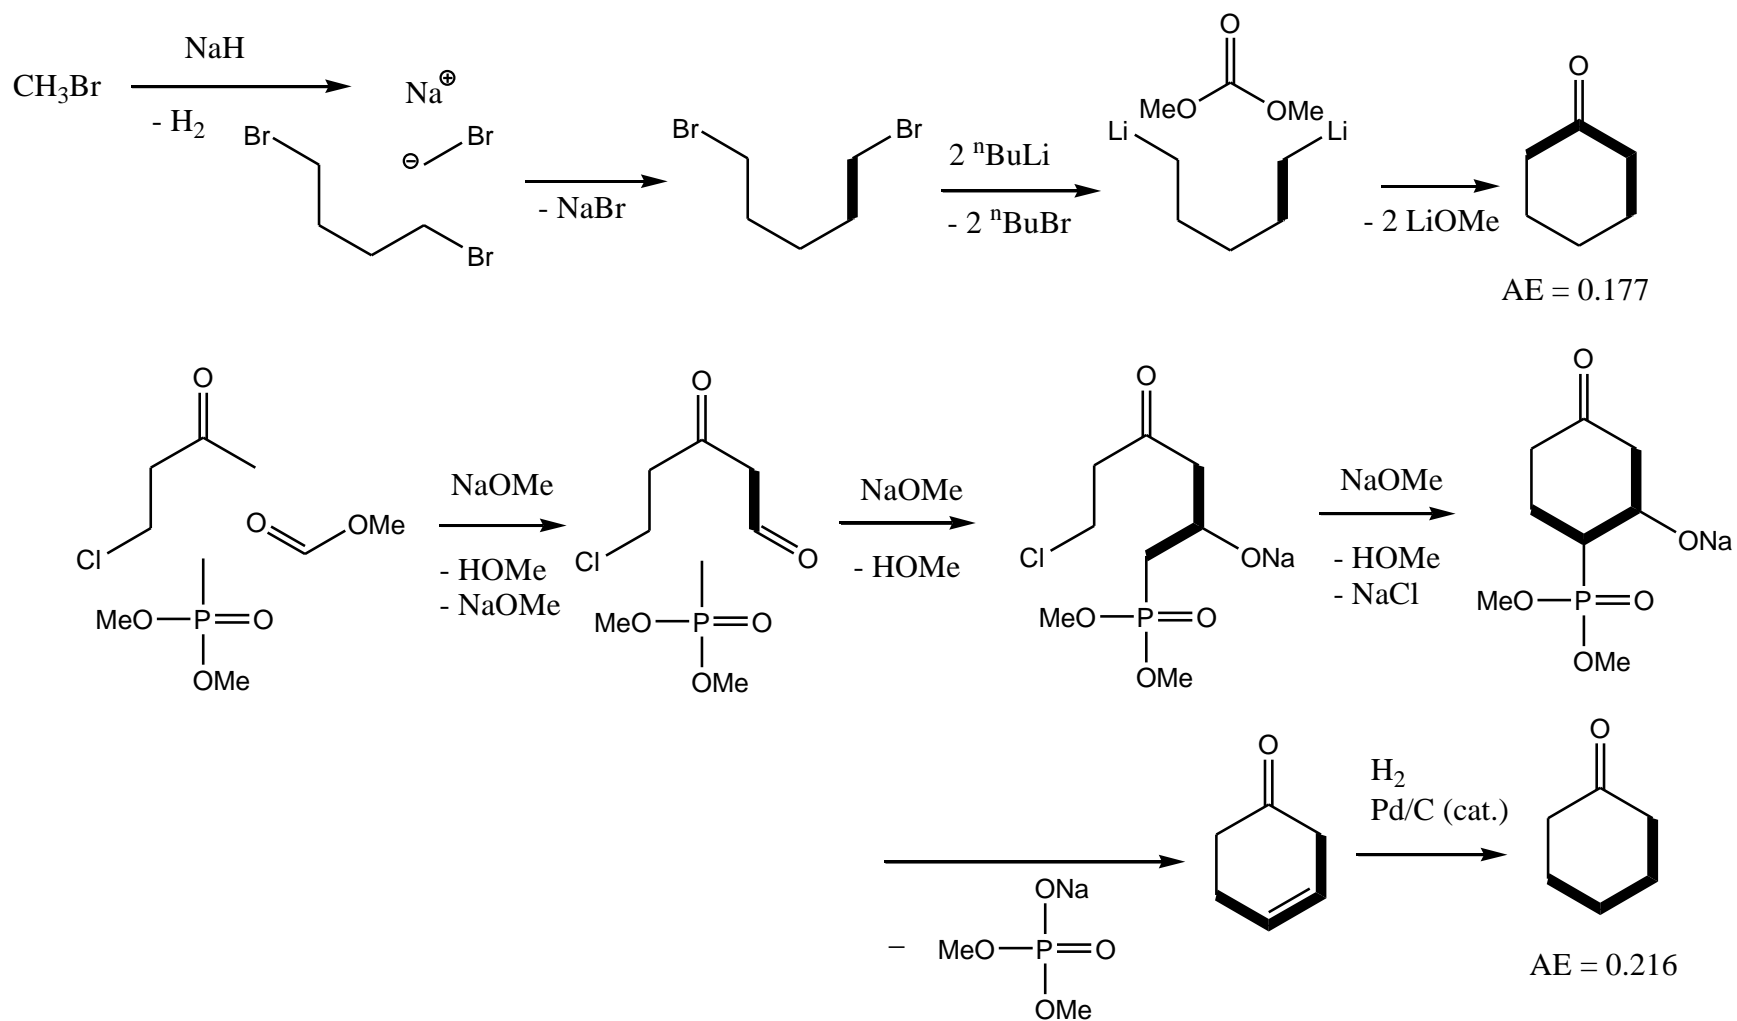

Scheme S2b. Three-component coupling sequences to make cyclohexanone via the [4 + 1 + 1] strategy. (continued)

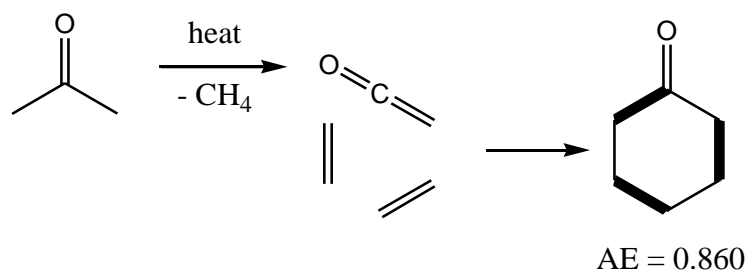

Scheme S3. Three-component coupling sequence to make cyclohexanone via the [2 + 2 + 2] strategy.



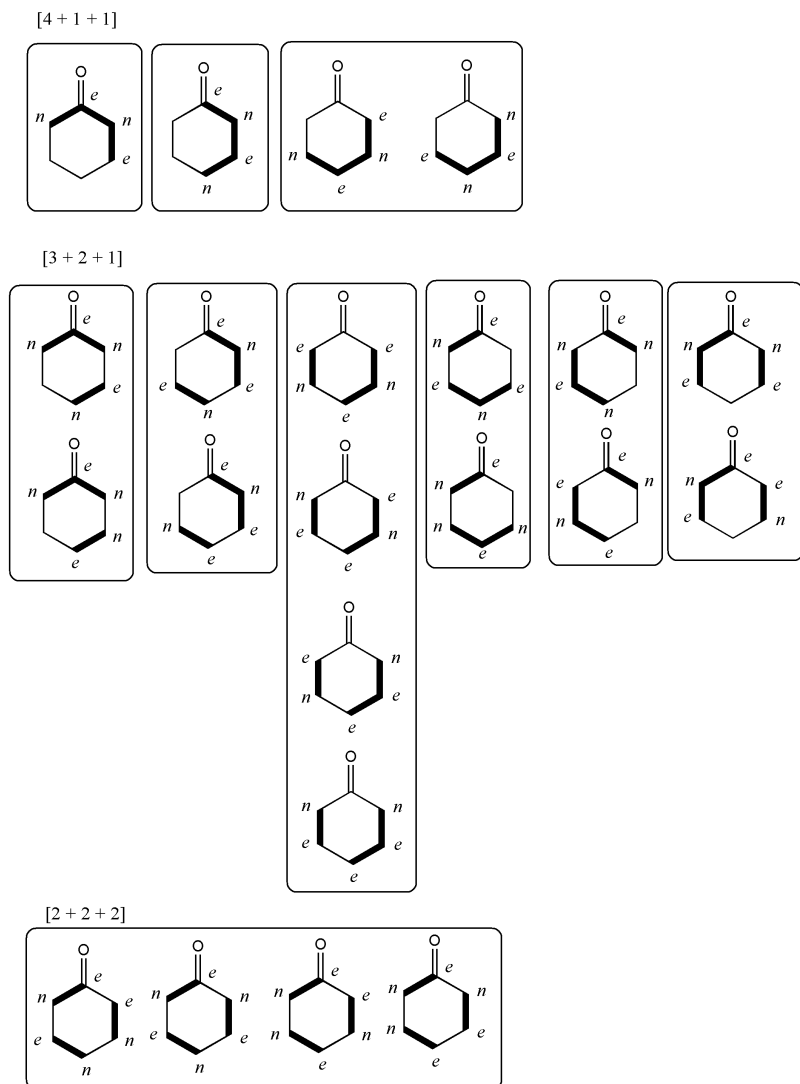

Figure S1. Nucleophilic-electrophilic labelling of centres in 3-partition fragments of cyclohexanone.

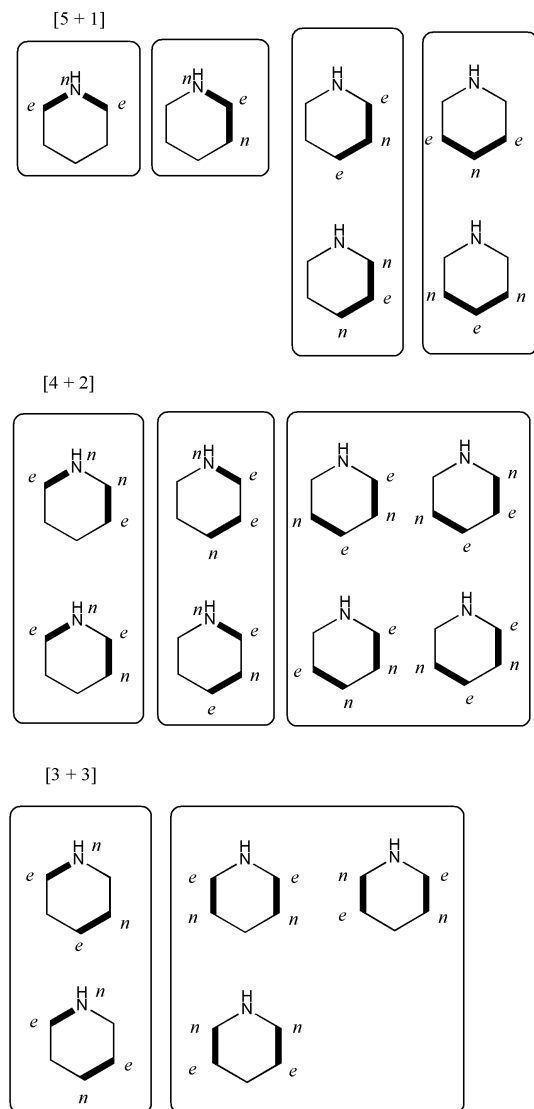

Figure S2. Nucleophilic-electrophilic labelling of centres in 2-partition fragments of piperidine.

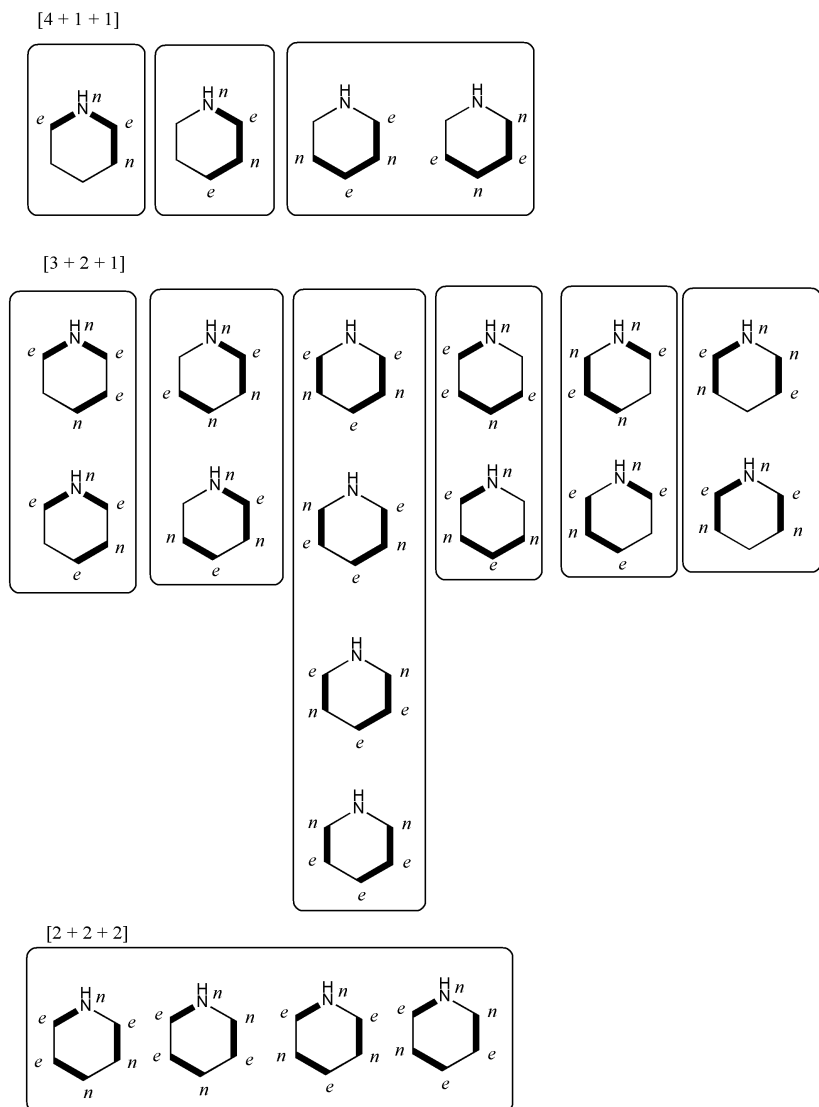

Figure S3. Nucleophilic-electrophilic labelling of centres in 3-partition fragments of piperidine.

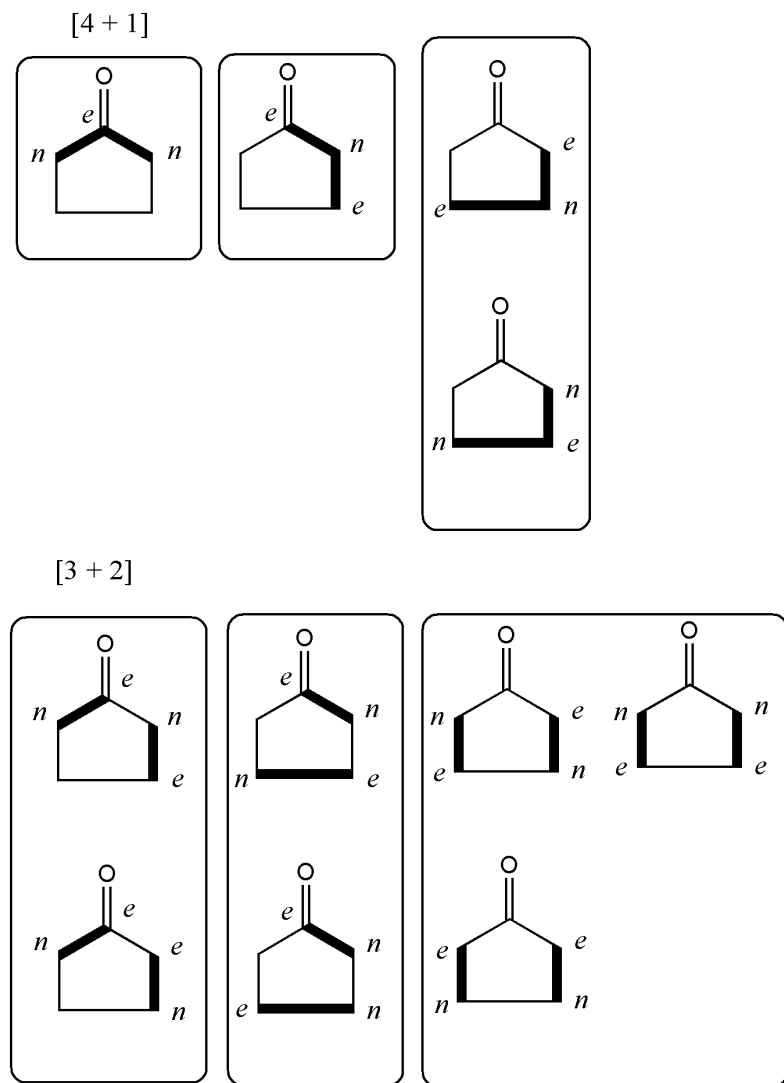

Figure S4. Nucleophilic-electrophilic labelling of centres in 2-partition fragments of cyclopentanone.

[3 + 1 + 1]

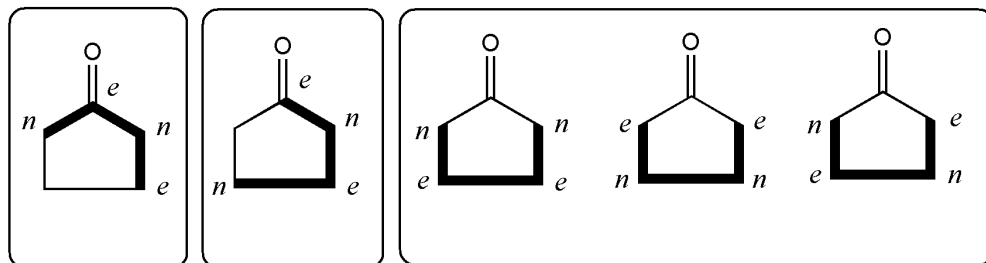

[2 + 2 + 1]

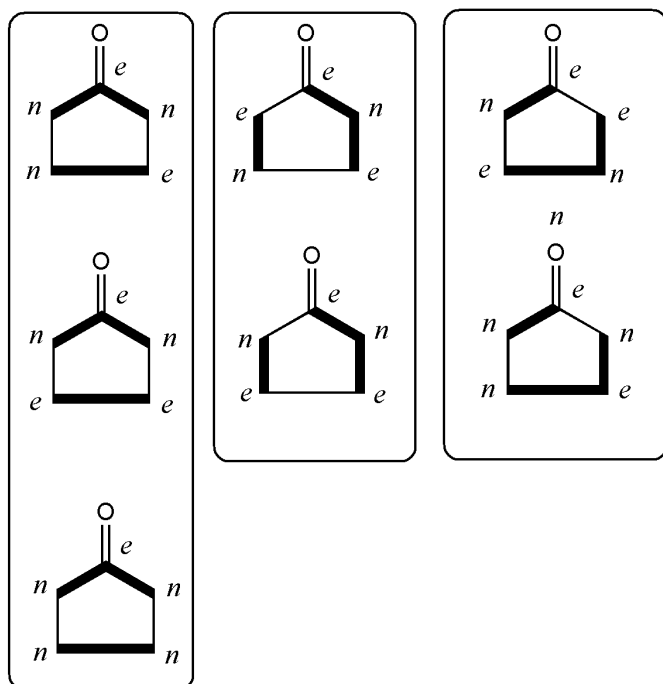

Figure S5. Nucleophilic-electrophilic labelling of centres in 3-partition fragments of cyclopentanone.

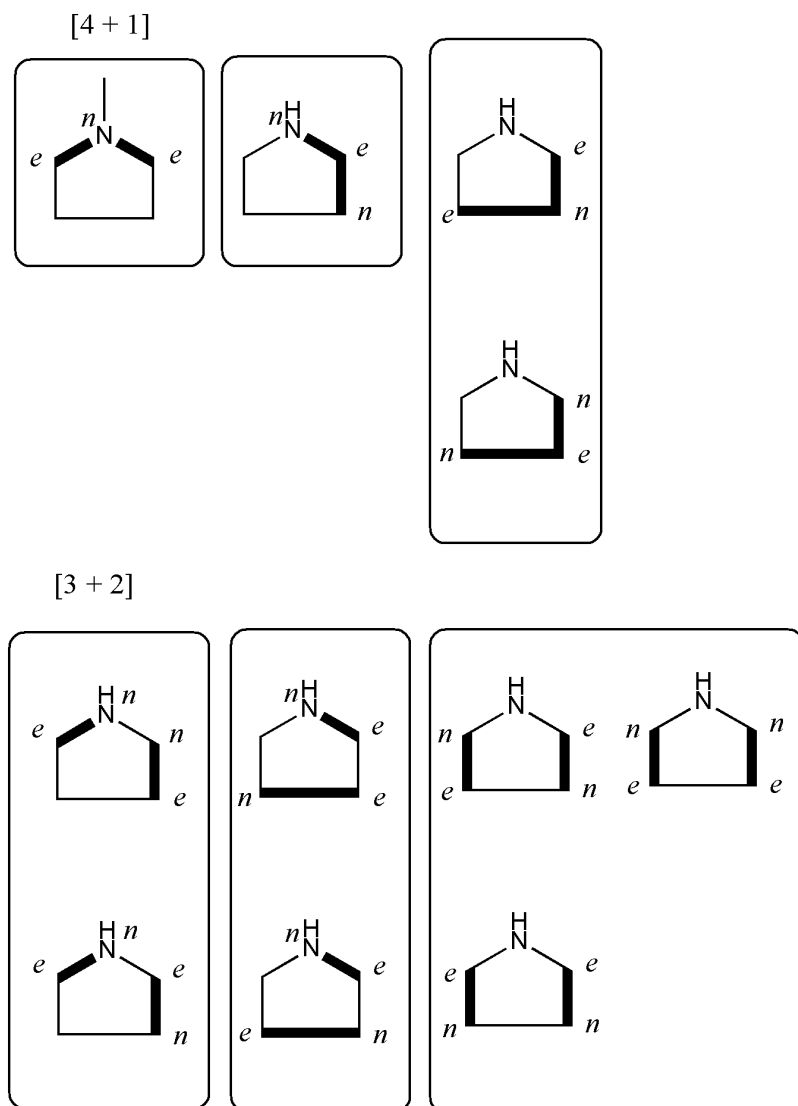

Figure S6. Nucleophilic-electrophilic labelling of centres in 2-partition fragments of pyrrolidine.

[3 + 1 + 1]

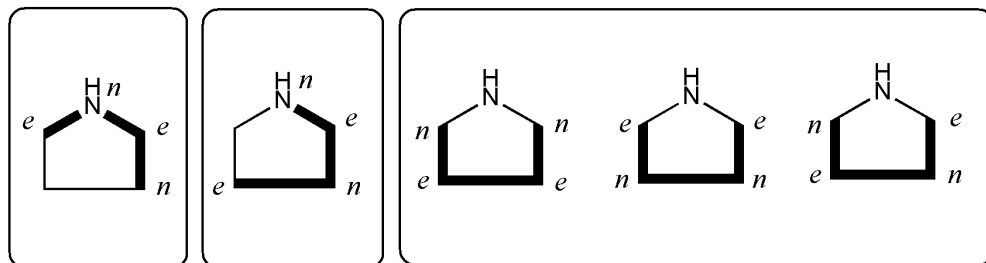

[2 + 2 + 1]

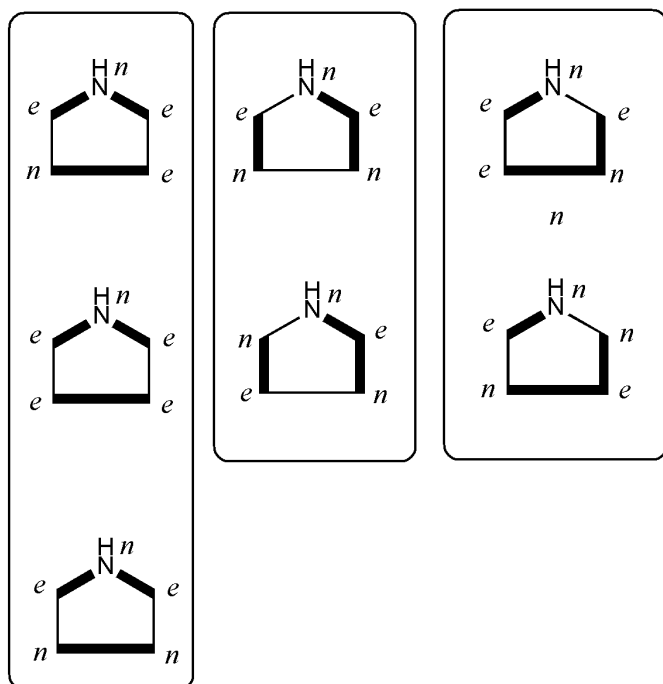

Figure S7. Nucleophilic-electrophilic labelling of centres in 3-partition fragments of pyrrolidine.

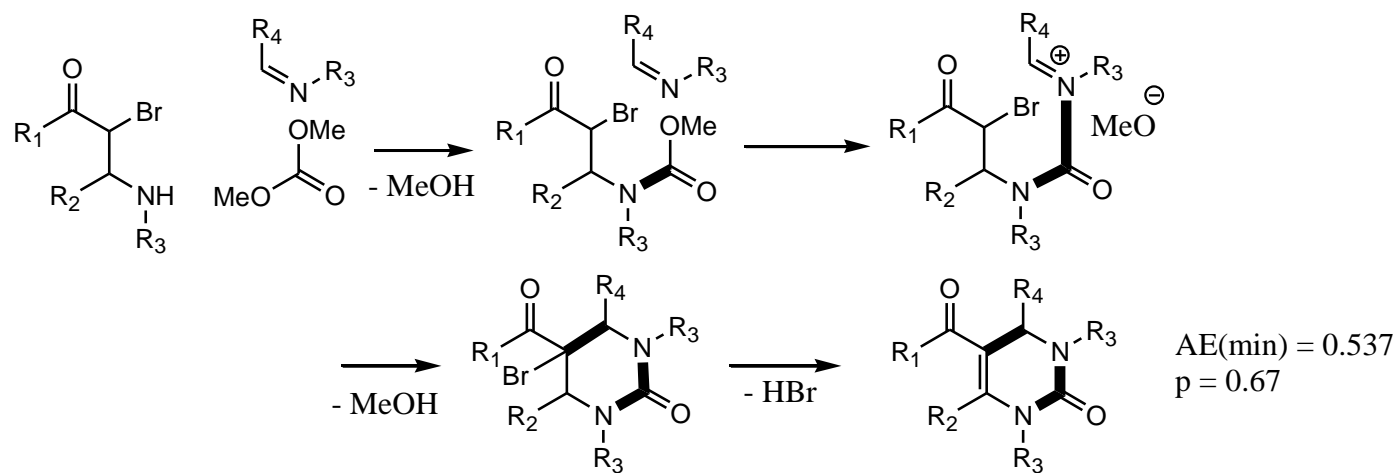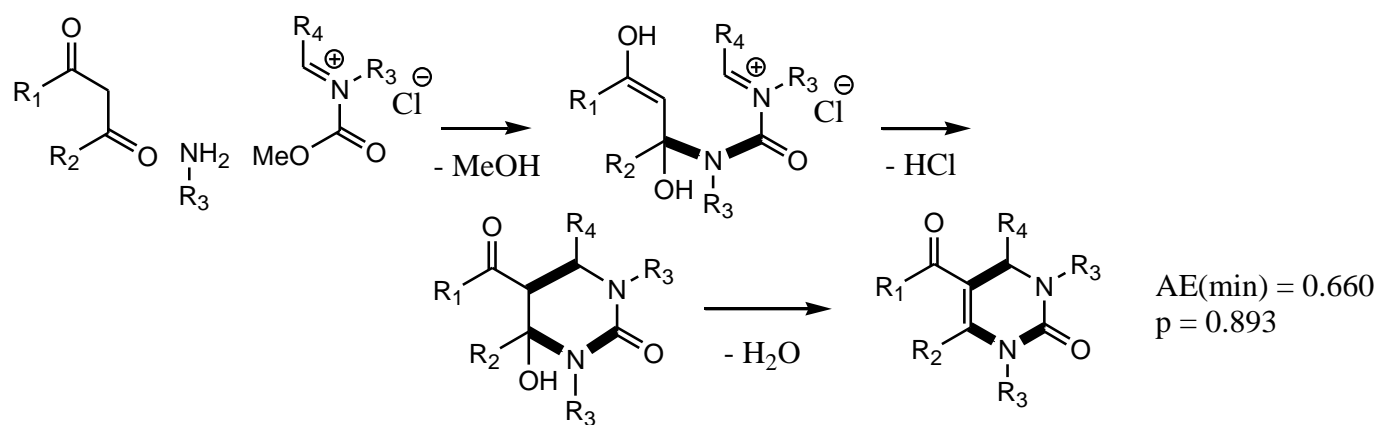





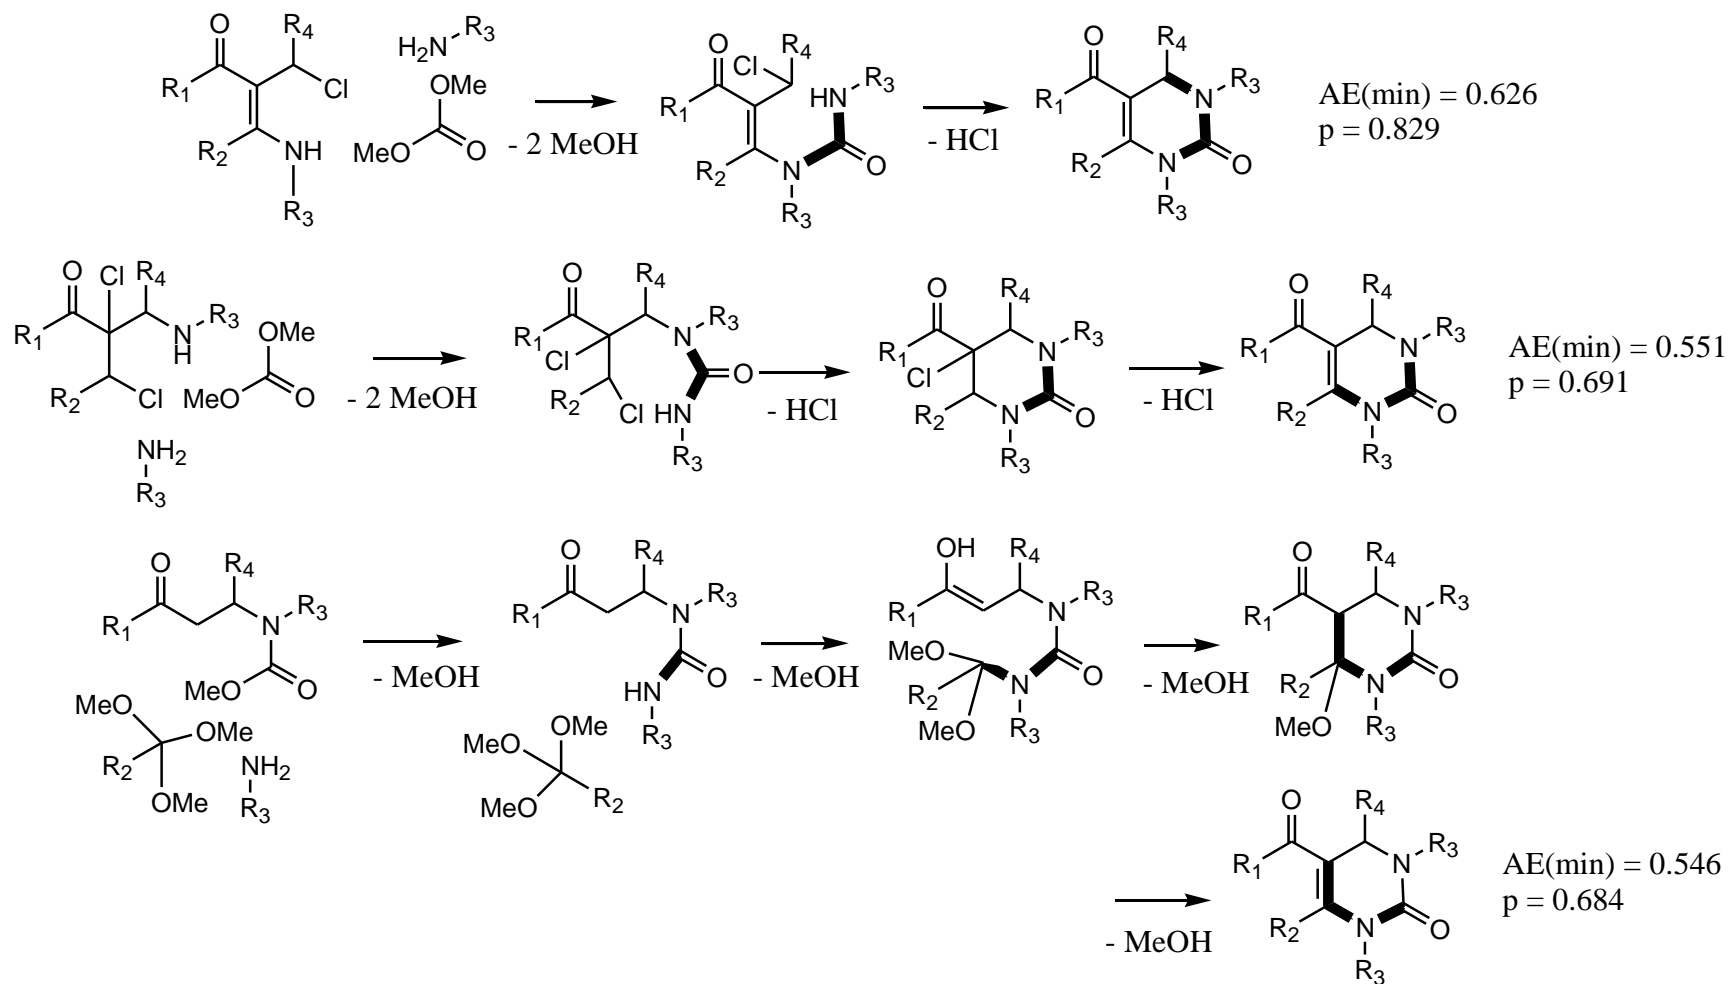

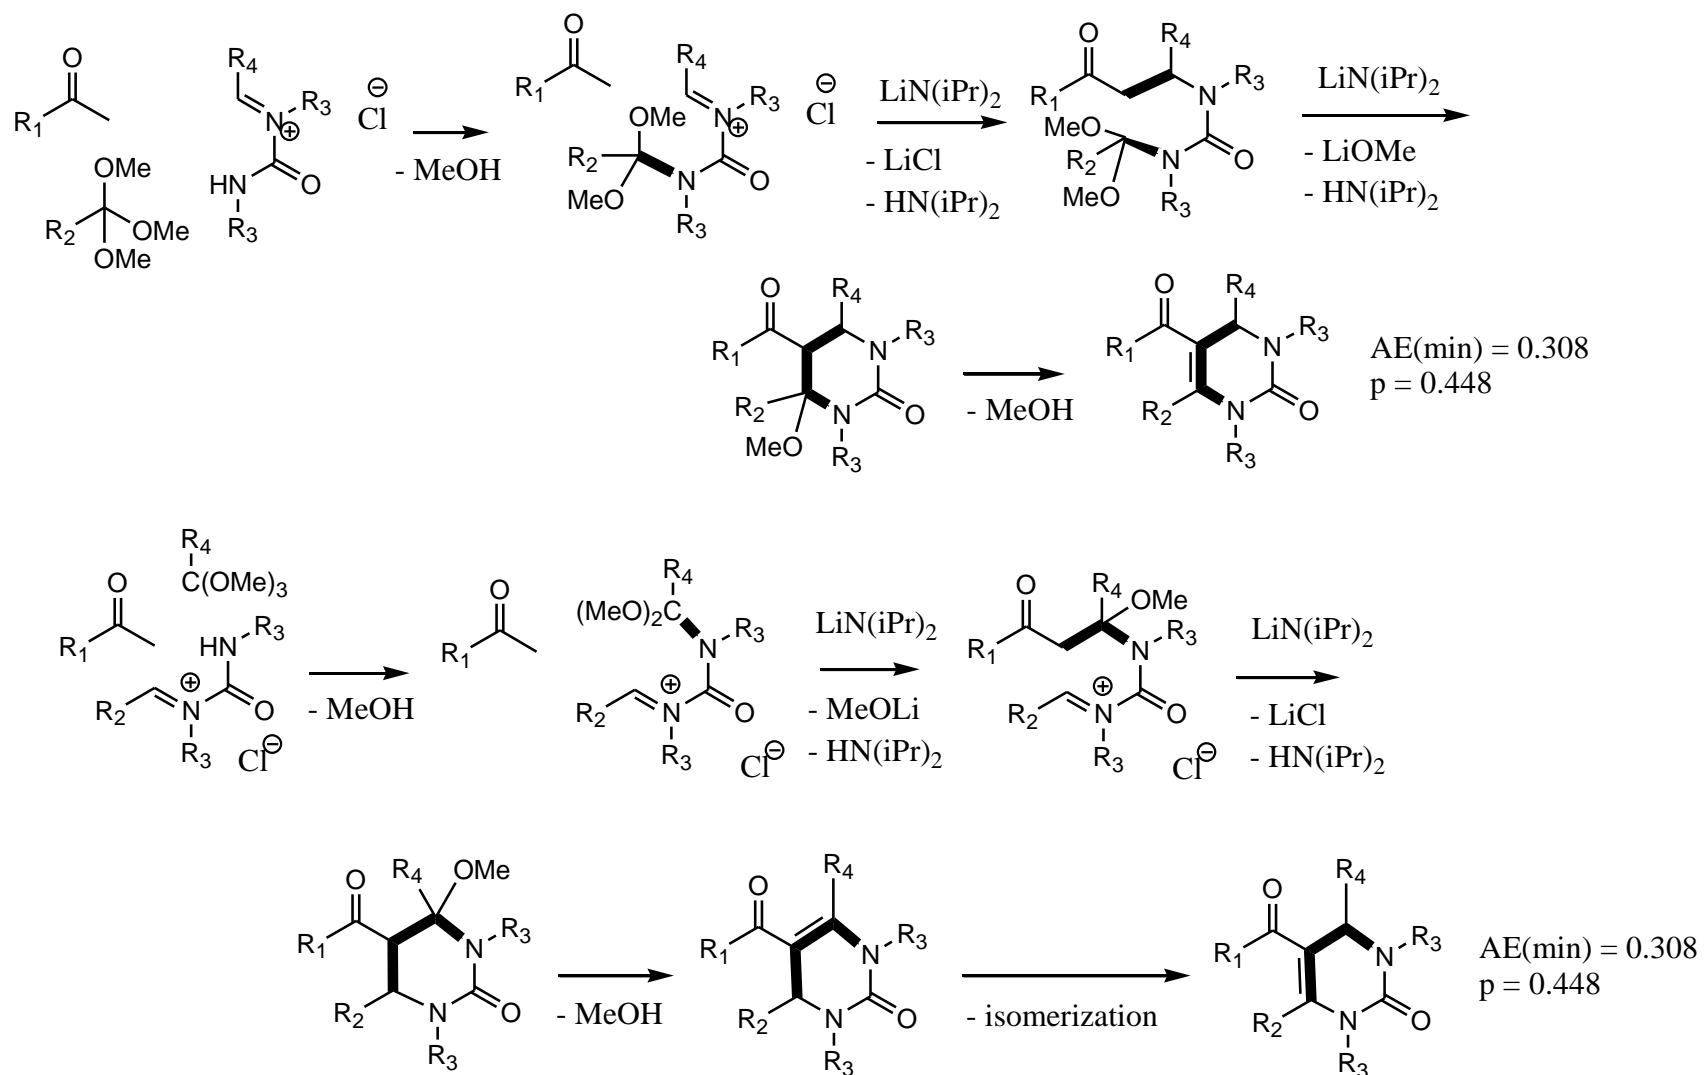

Scheme S5. Conjectured syntheses of the Biginelli adduct via new [4 + 1 + 1] mapping strategies.

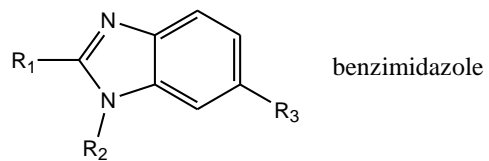

[2 + 2 + 1]

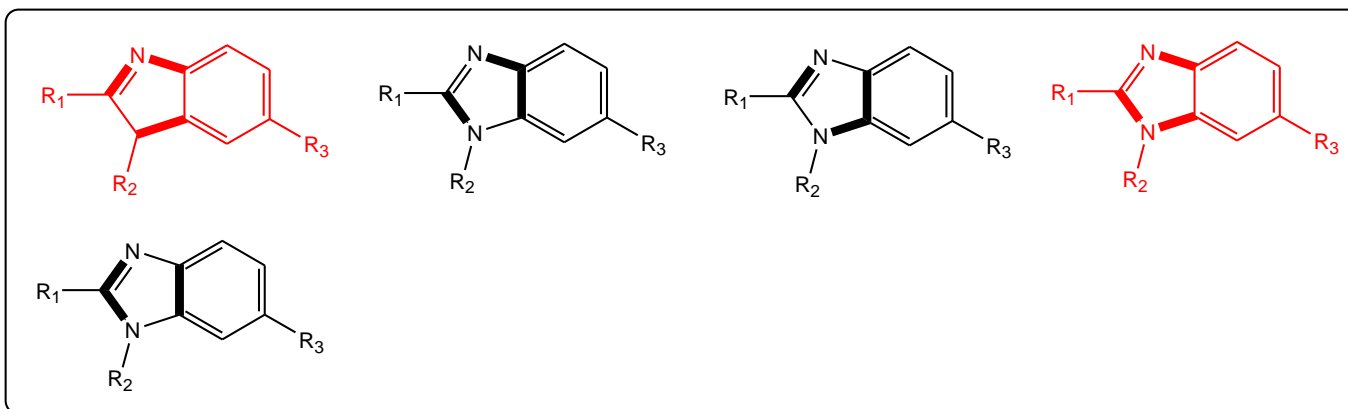

[3 + 1 + 1]

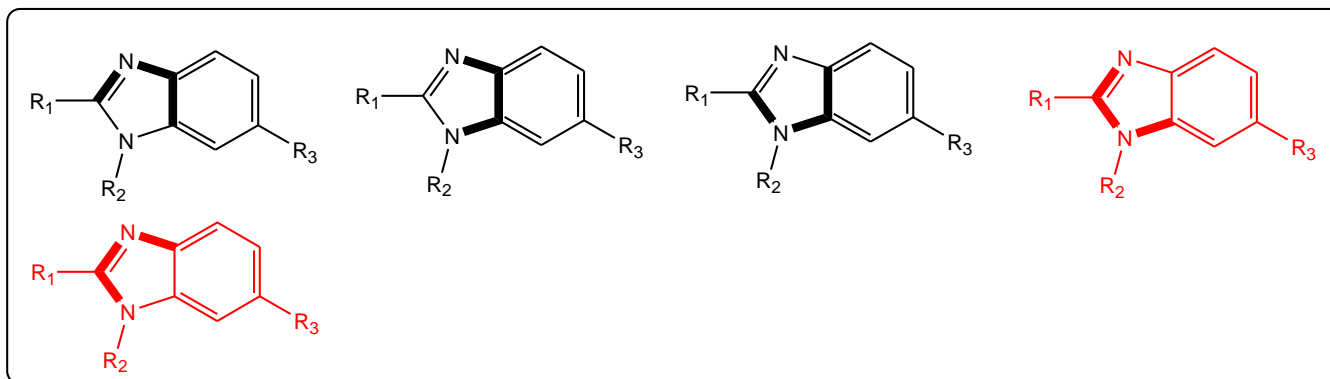

Schemes S6. Superposition of 3-partition templates for benzimidazole.

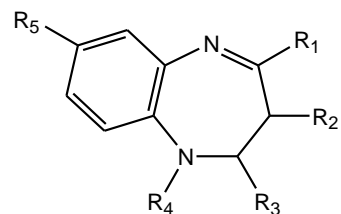

2,3-Dihydro-1H-benzo[b][1,4]diazepine

three bond cuts

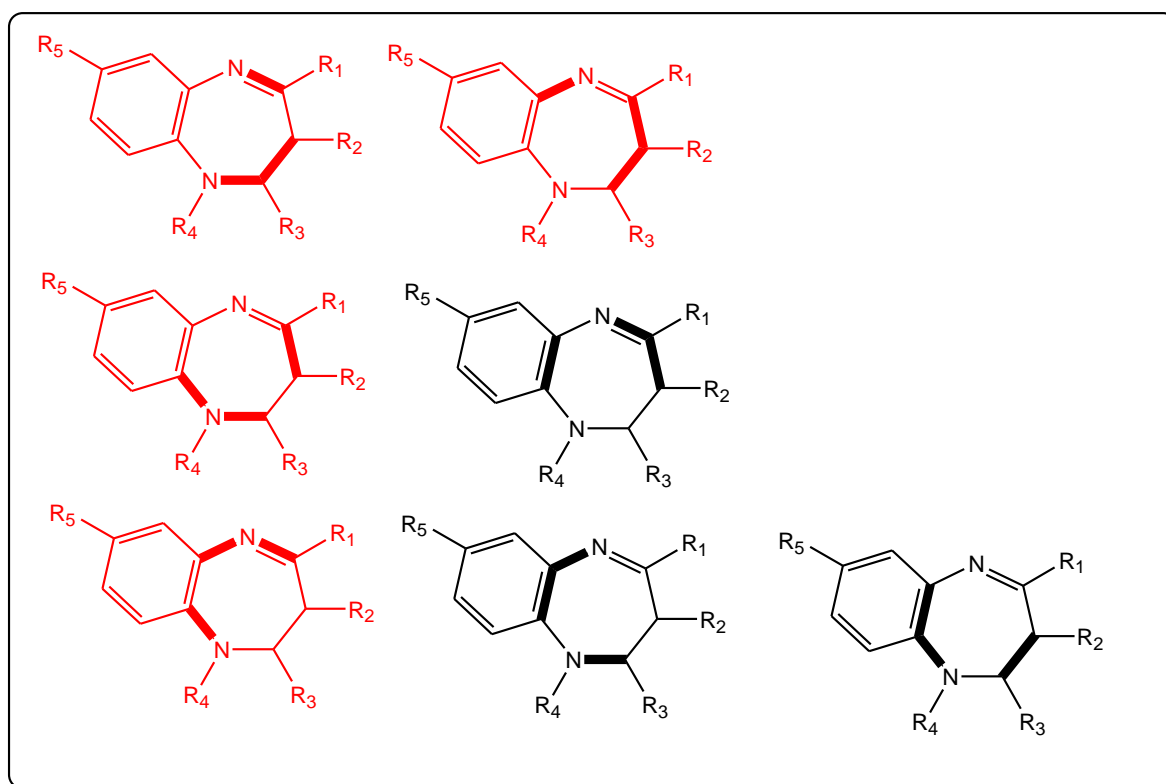

4 + 2 + 1

Schemes S7a. Superposition of [4+2+1] 3-partition templates for benzodiazepine.

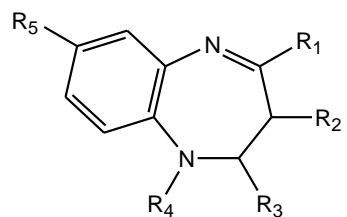2,3-Dihydro-1H-benzo[*b*][1,4]diazepine

three bond cuts

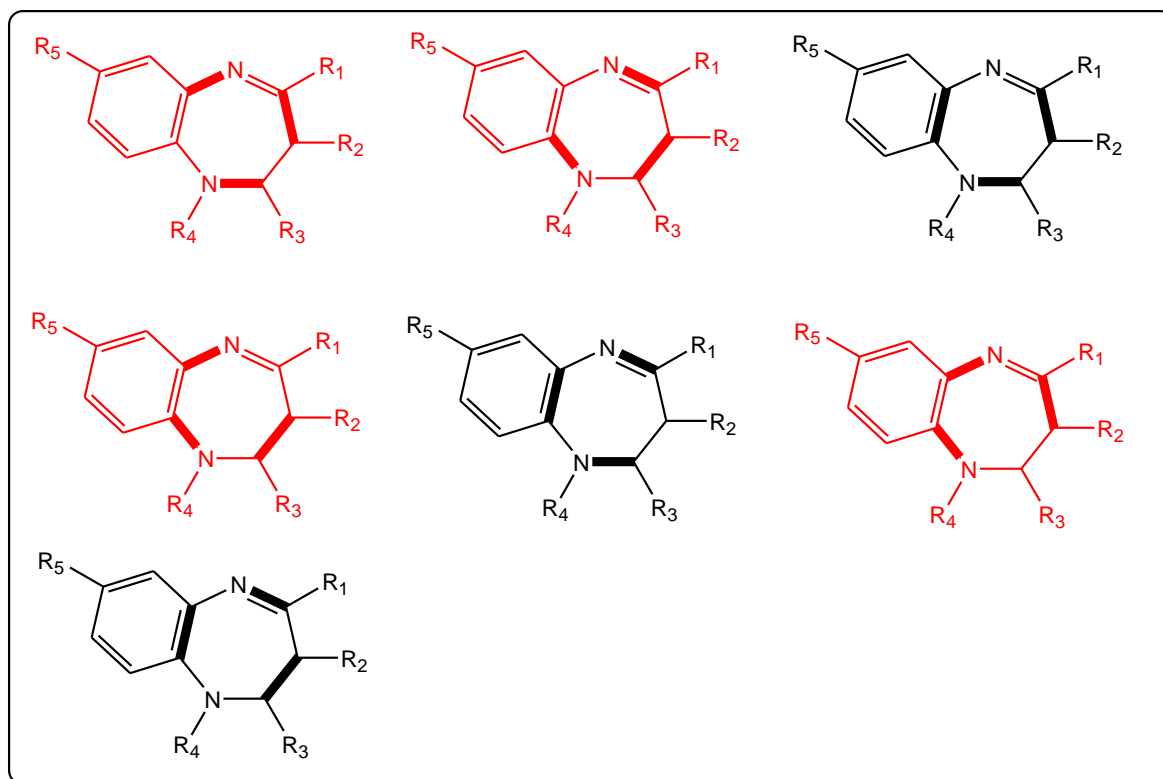

Schemes S7b. Superposition of [3+2+2] 3-partition templates for benzodiazepine.

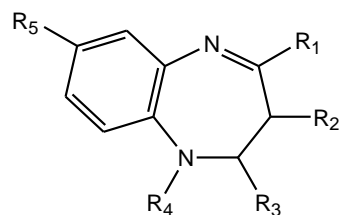

2,3-Dihydro-1H-benzo[b][1,4]diazepine

three bond cuts

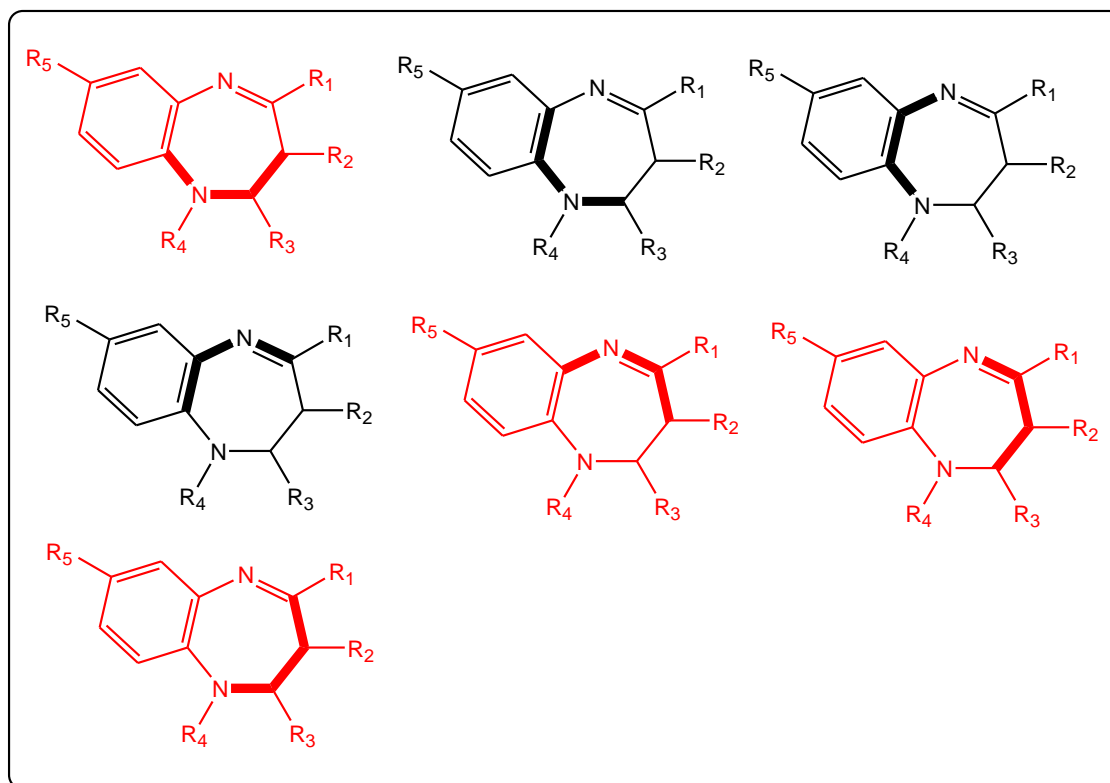

5 + 1 + 1

Schemes S7c. Superposition of [5+1+1] 3-partition templates for benzodiazepine.

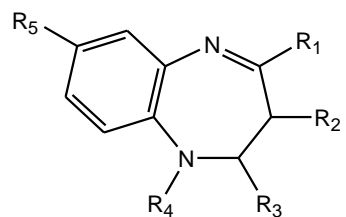2,3-Dihydro-1*H*-benzo[*b*][1,4]diazepinethree bond cuts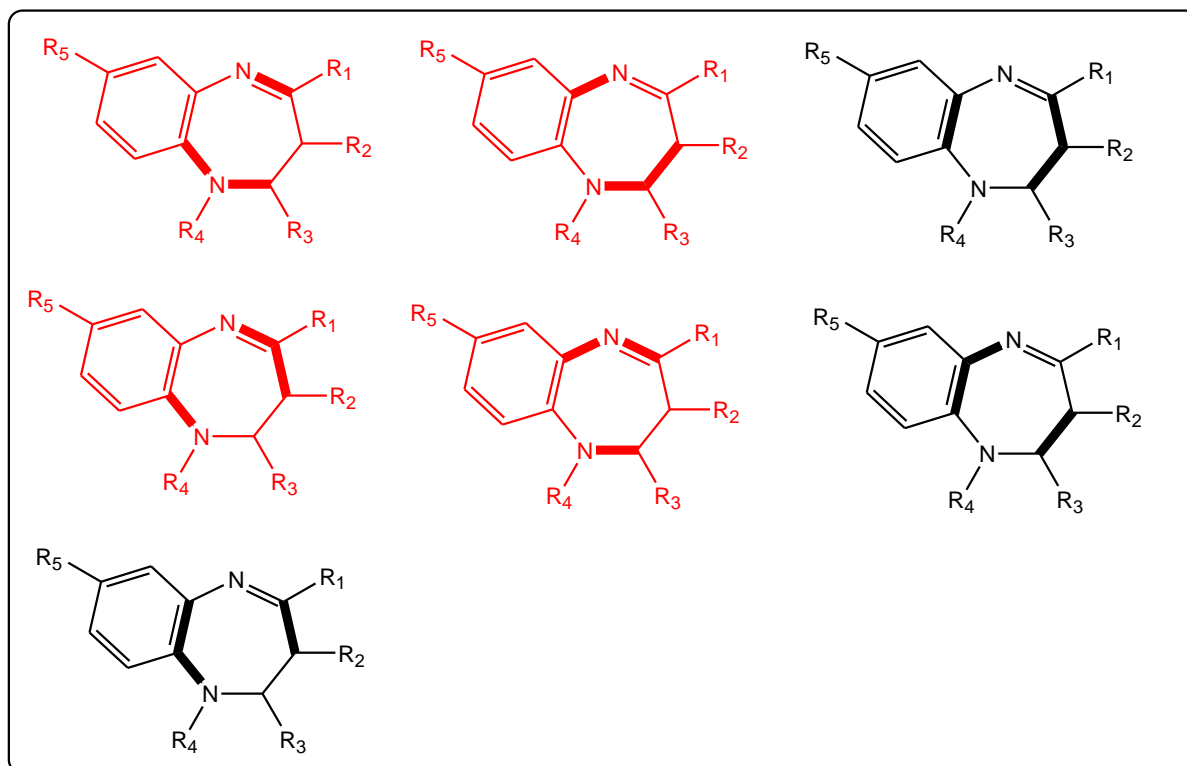

3 + 3 + 1

Schemes S7d. Superposition of [3+3+1] 3-partition templates for benzodiazepine.



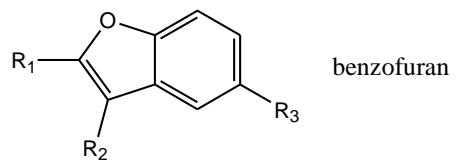

[2 + 2 + 1]

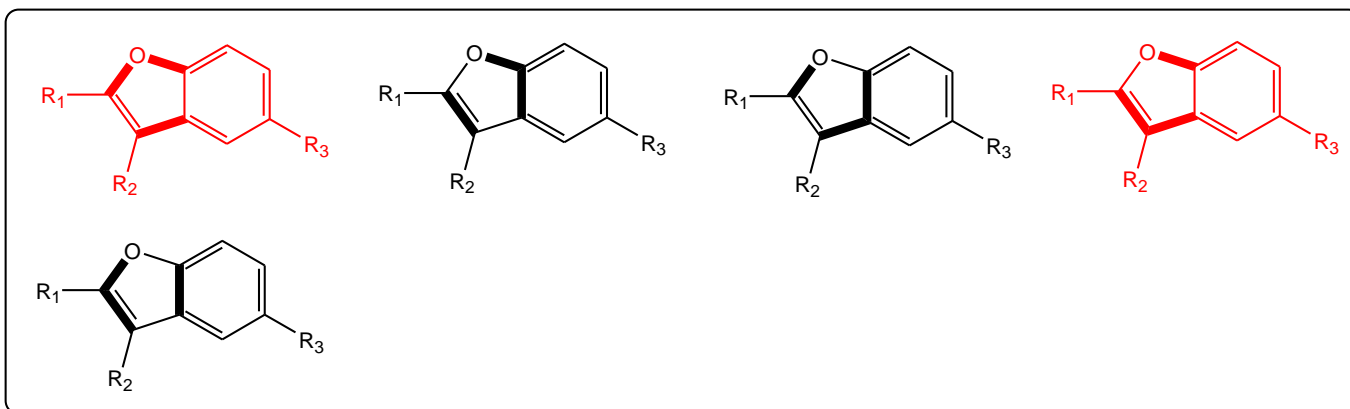

[3 + 1 + 1]

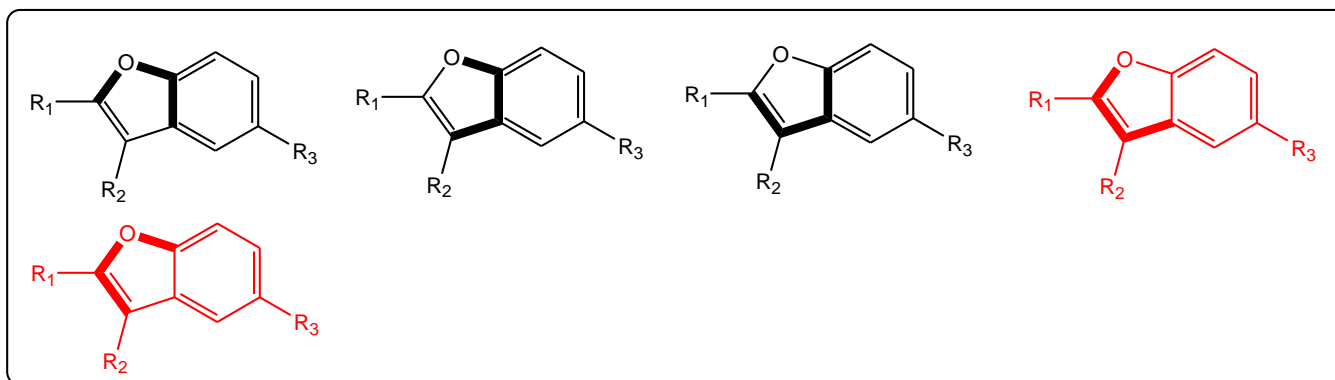

Schemes S8. Superposition of 3-partition templates for benzofuran.

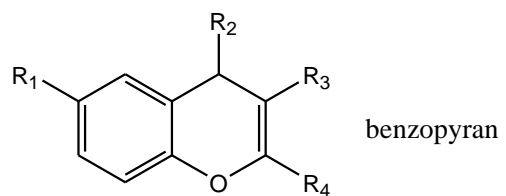

[4 + 1 + 1]

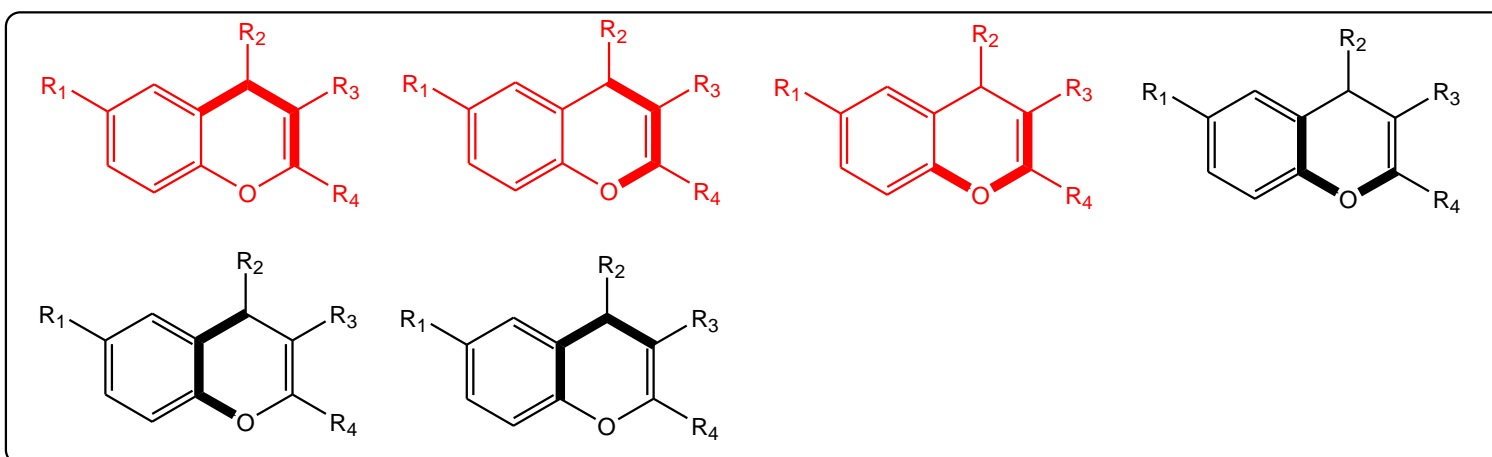

[2 + 2 + 2]

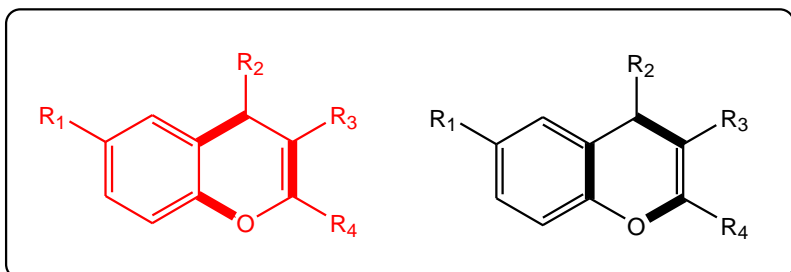

Schemes S9a. Superposition of [4 + 1 + 1] and [2 + 2 + 2] 3-partition templates for benzofuran.

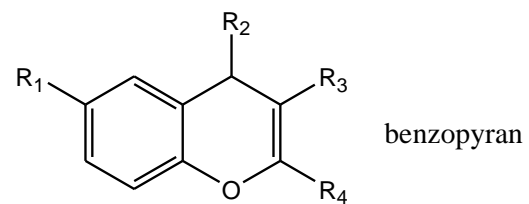

[3 + 2 + 1]

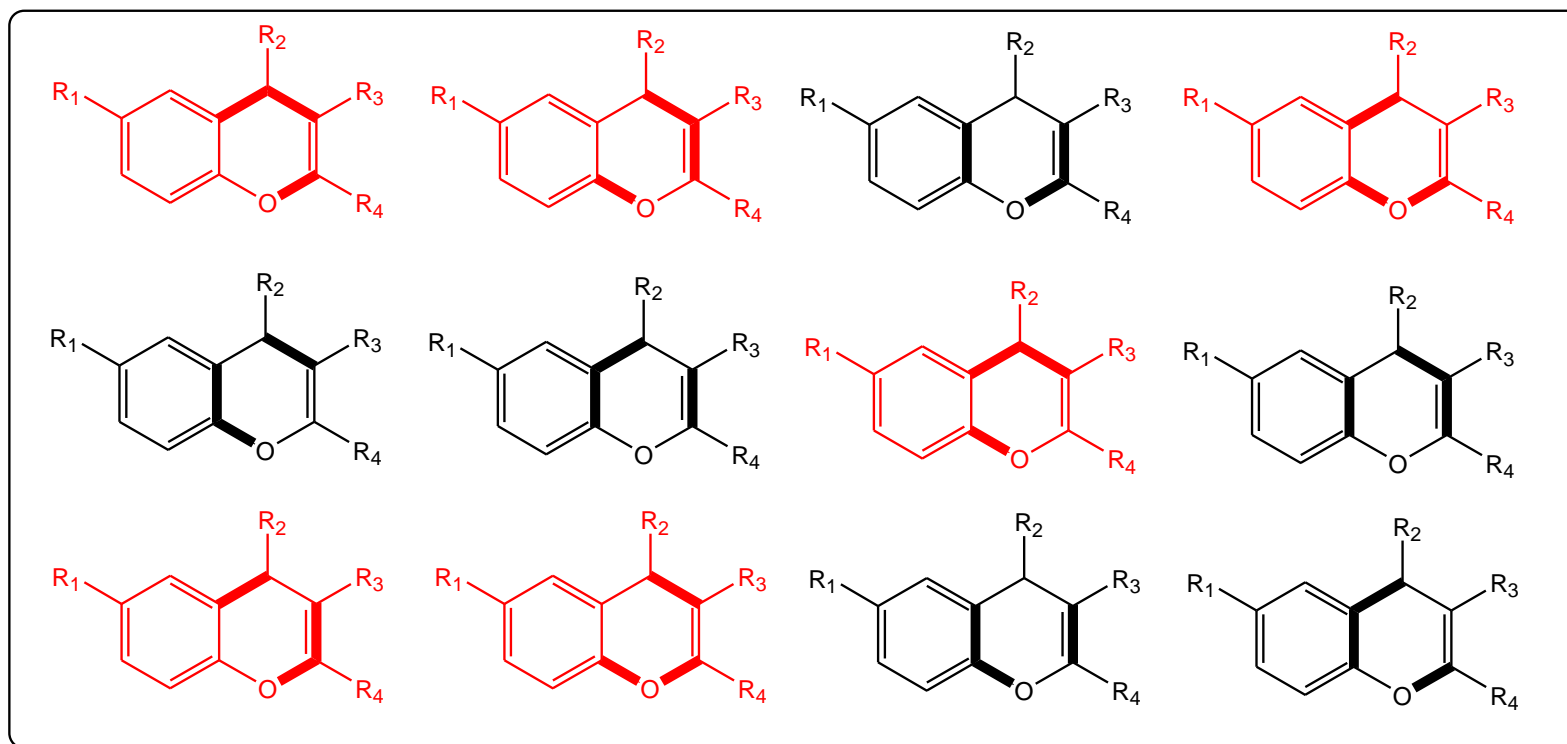

Schemes S9b. Superposition of [3 + 2 + 1] 3-partition templates for benzofuran.

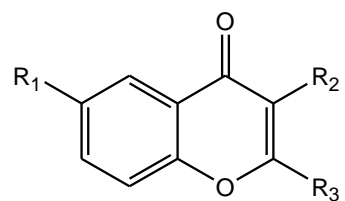

chromene-4-one

[4 + 1 + 1]

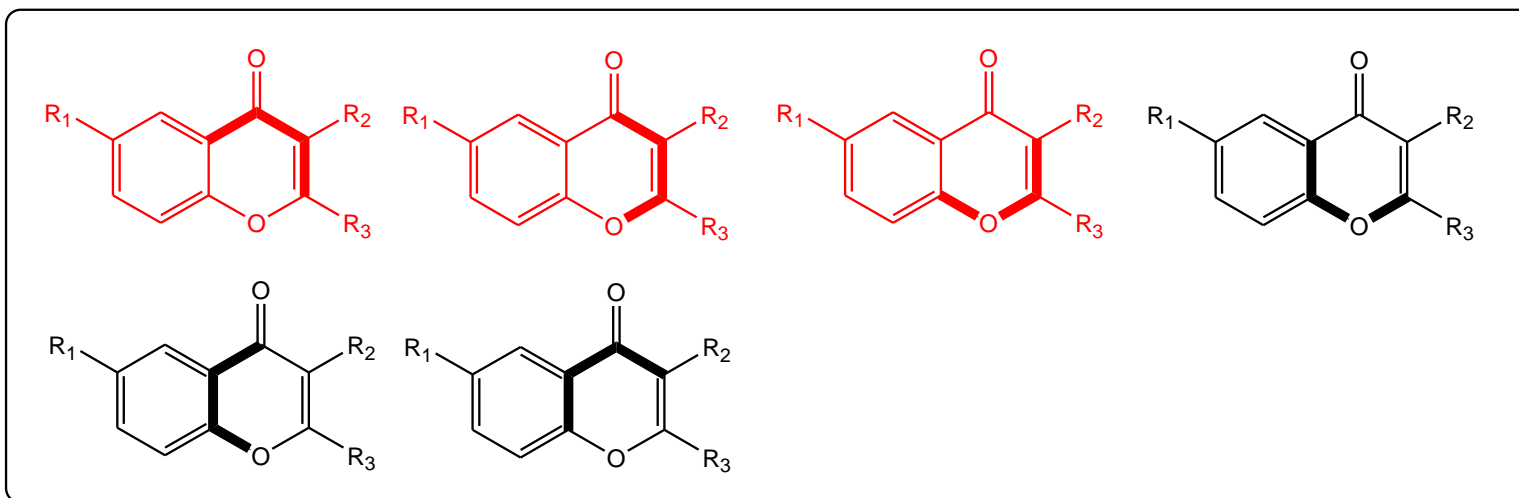

[2 + 2 + 2]

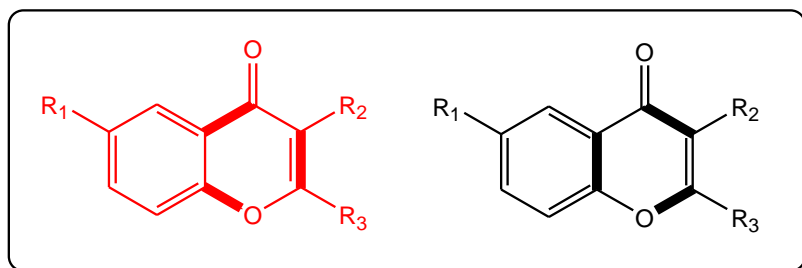

Schemes S10a. Superposition of [4 + 1 + 1] and [2 + 2 + 2] 3-partition templates for chromene-4-one.

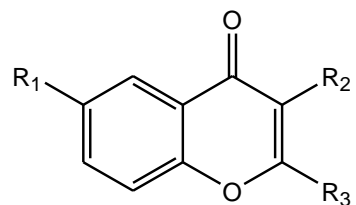

chromene-4-one

[3 + 2 + 1]

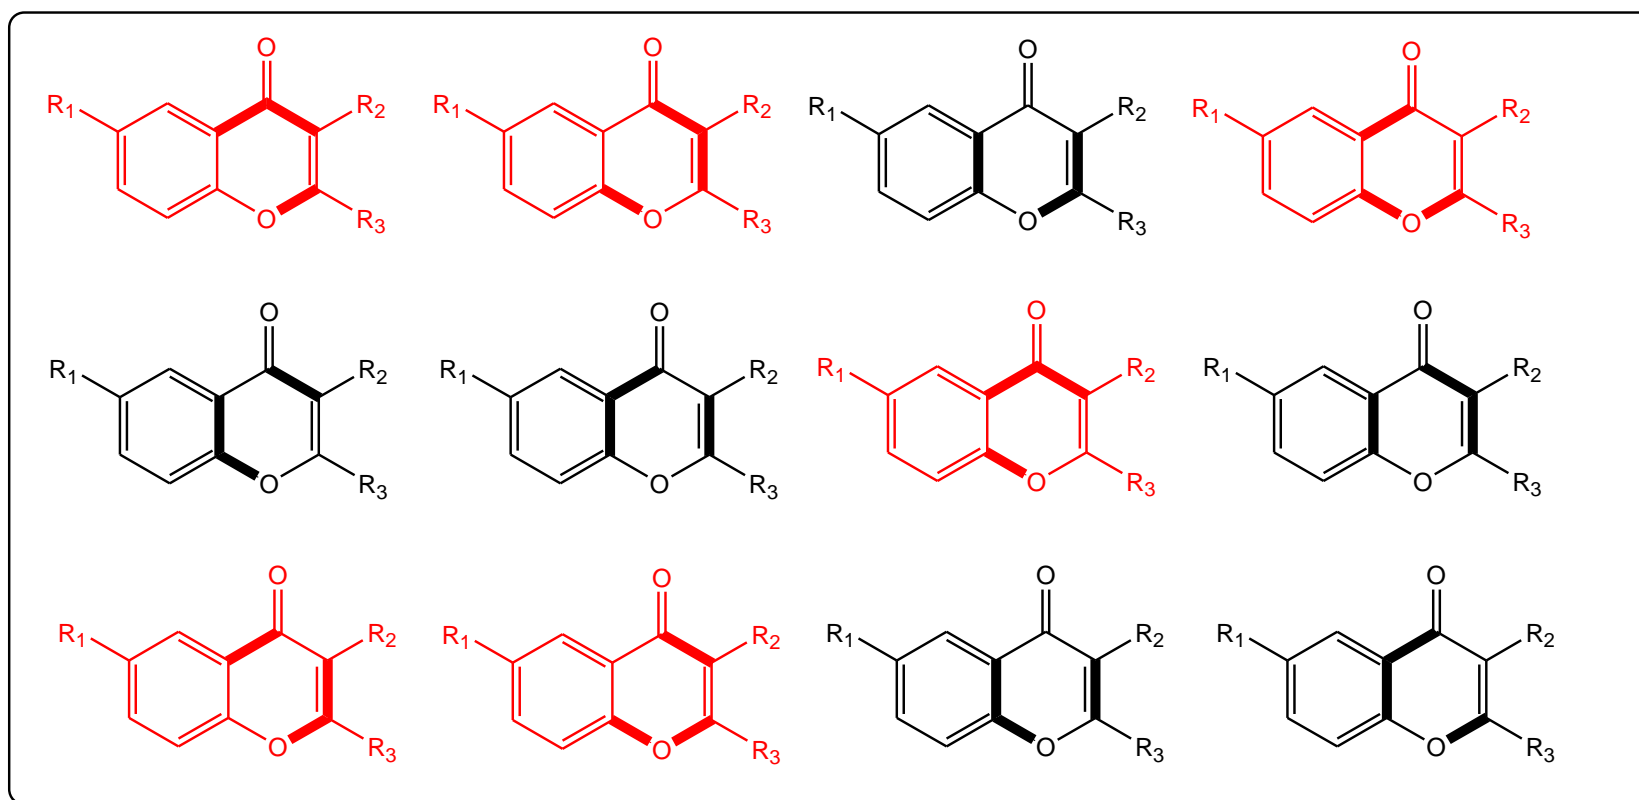

Schemes S10b. Superposition of [3 + 2 + 1] 3-partition templates for chromene-4-one.

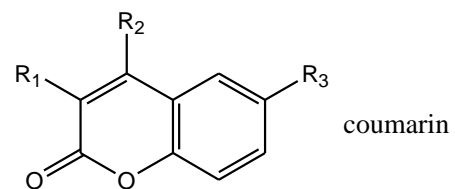

[4 + 1 + 1]

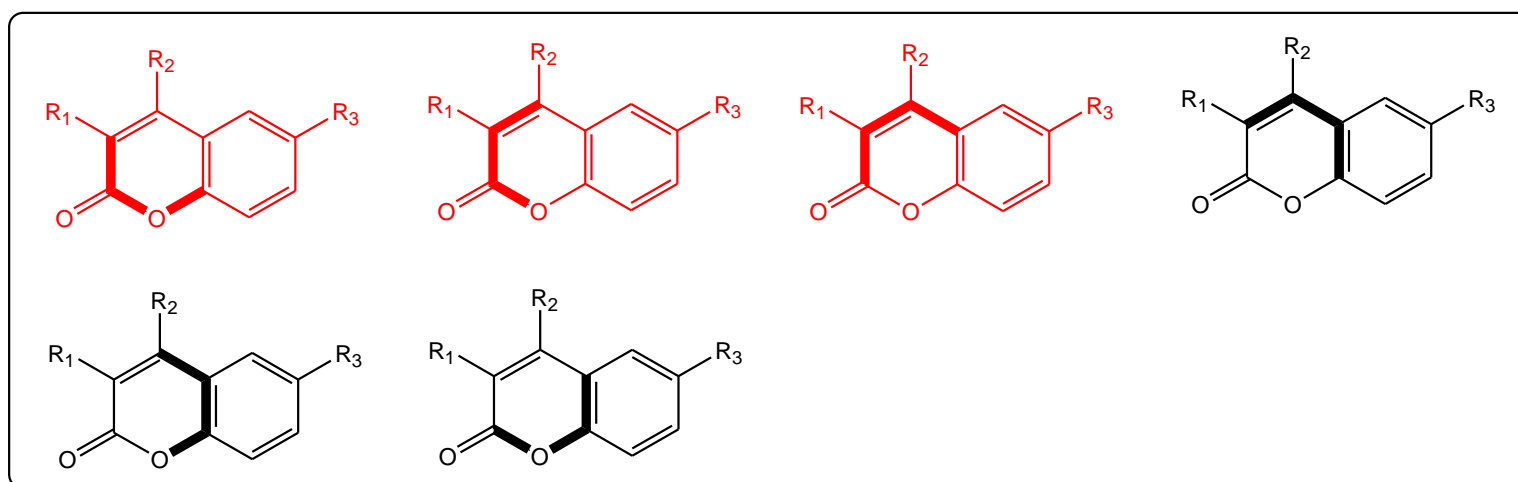

[2 + 2 + 2]

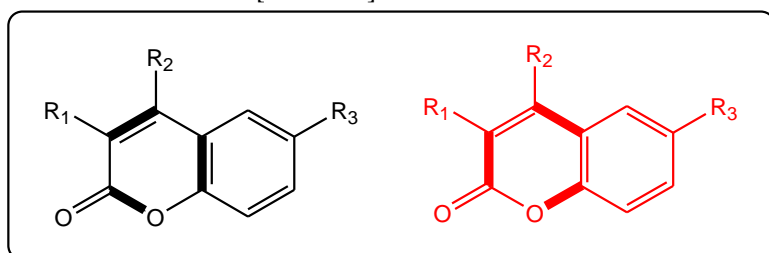

Schemes S11a. Superposition of [4 + 1 + 1] and [2 + 2 + 2] 3-partition templates for coumarin.

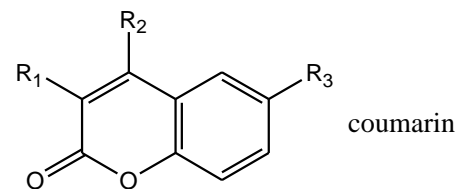
 $3 + 2 + 1$ 
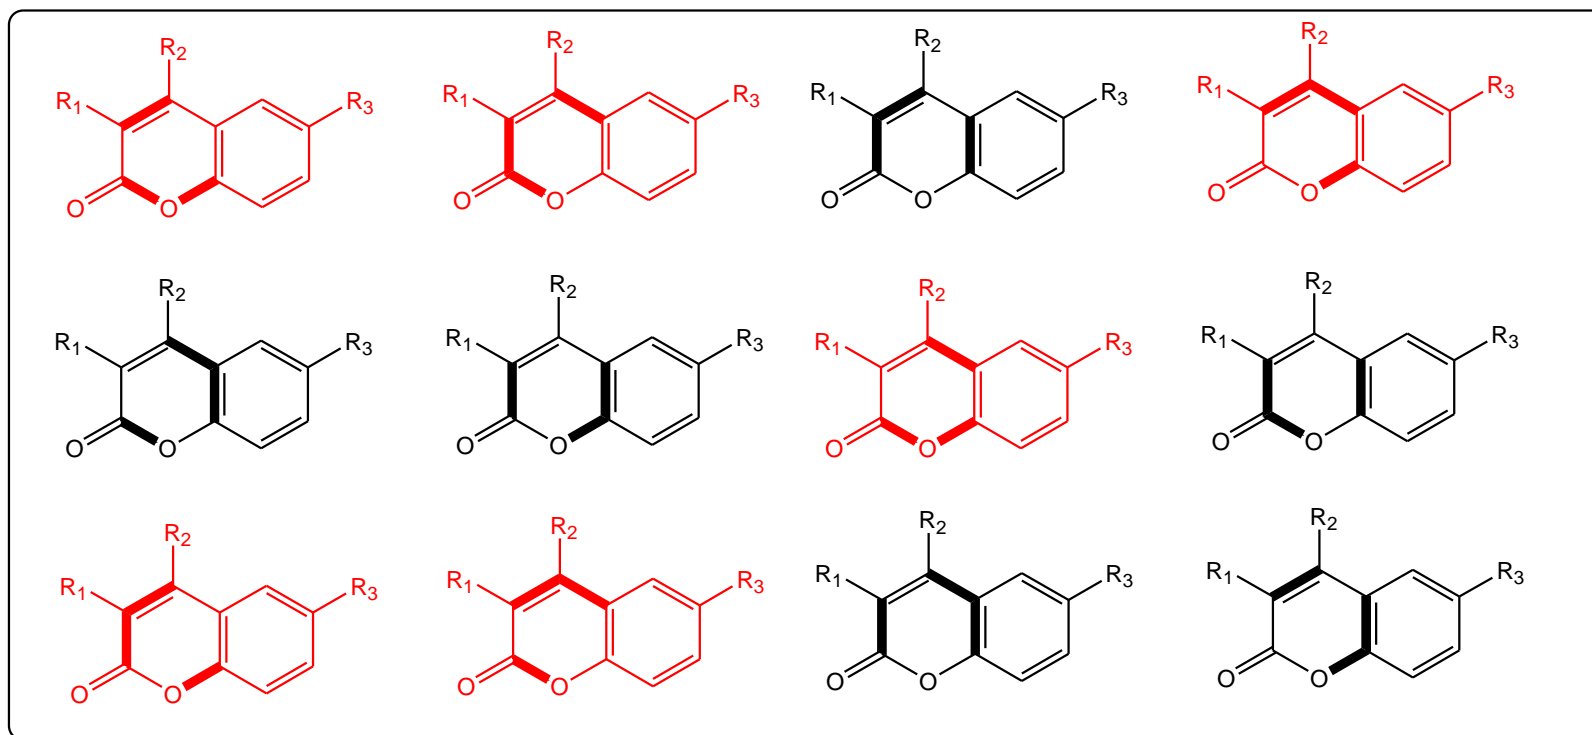

Schemes S11b. Superposition of  $[3 + 2 + 1]$  3-partition templates for coumarin.

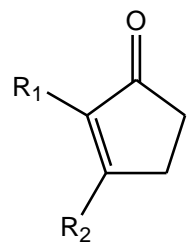

cyclopent-2-enone

three bond cuts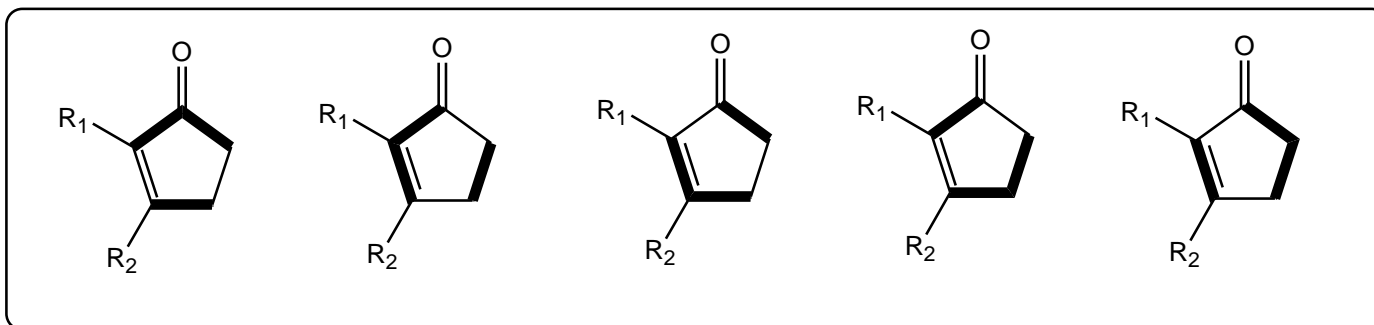

2 + 2 + 1

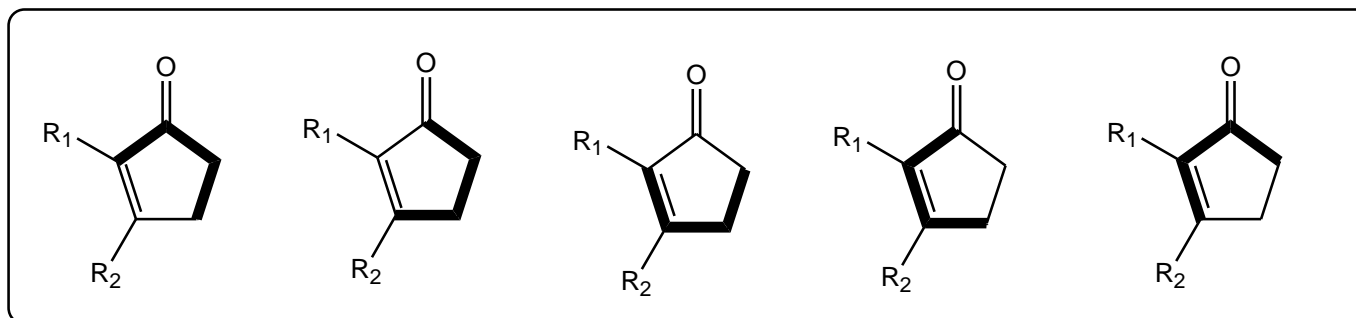

3 + 1 + 1

Schemes S12. Superposition of 3-partition templates for cyclopent-2-enone.



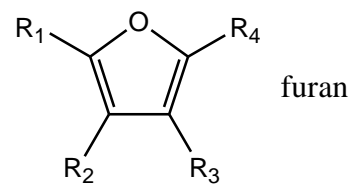

three bond cuts

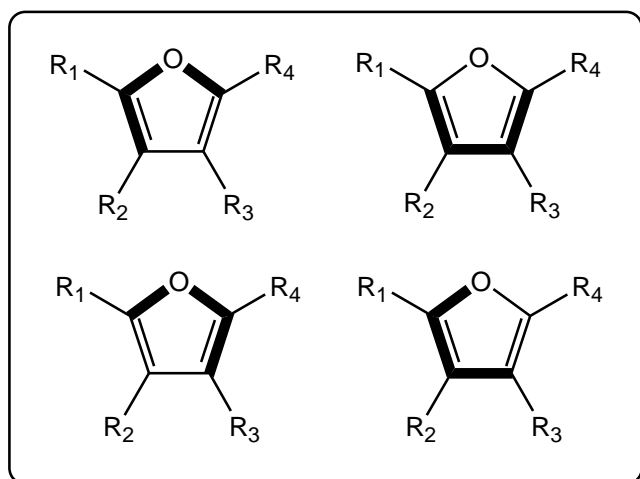

[3 + 1 + 1]

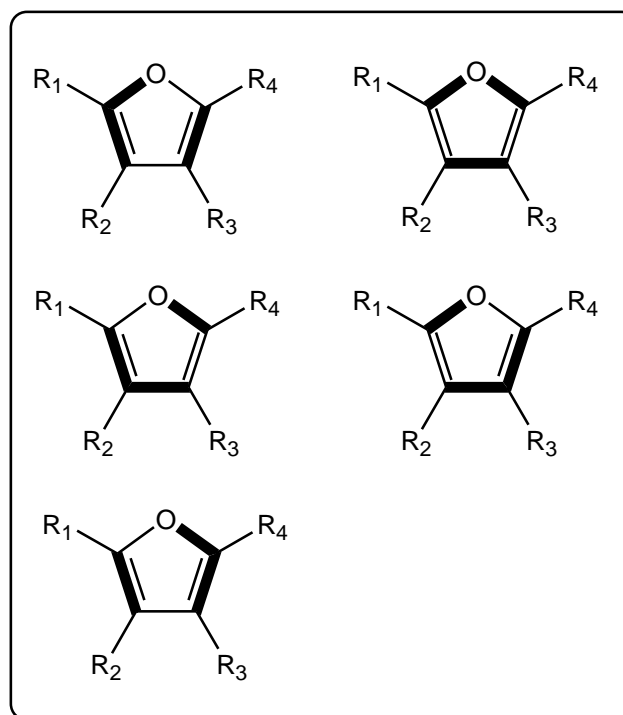

[2 + 2 + 1]

Schemes S13. Superposition of 3-partition templates for furan.

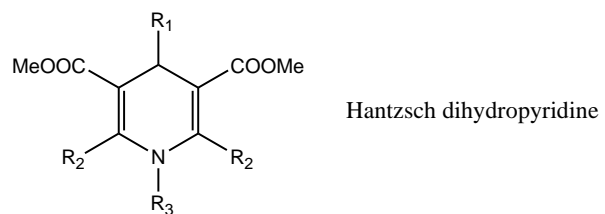

three bond cuts    4 + 1 + 1

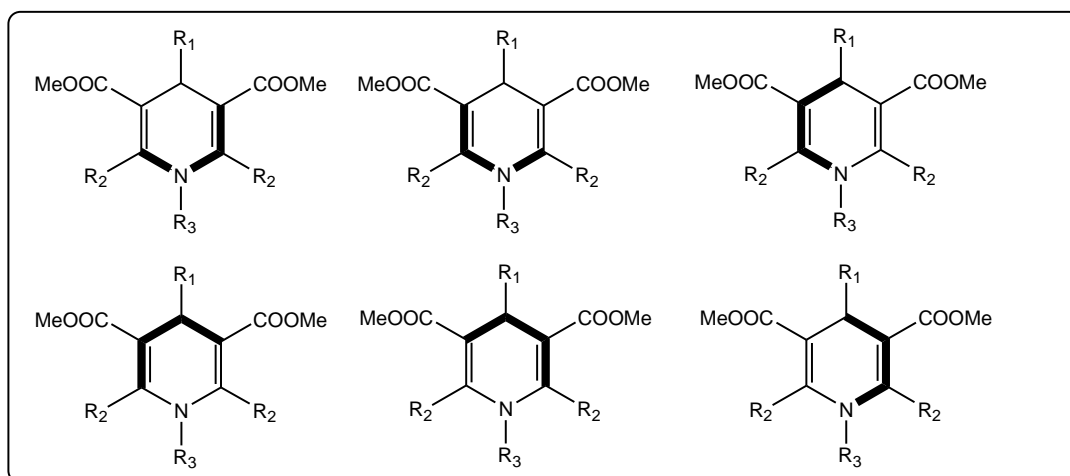

2 + 2 + 2

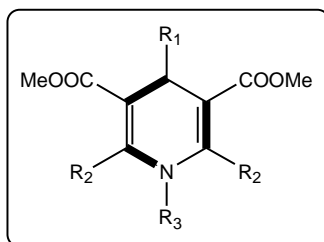

Schemes S14a. Superposition of [4 + 1 + 1] and [2 + 2 + 2] 3-partition templates for Hantzsch dihydropyridine.

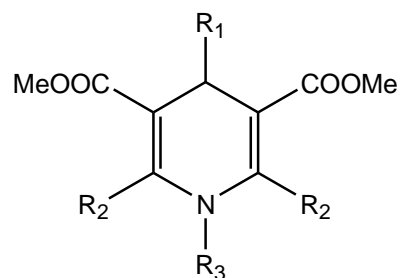

Hantzsch dihydropyridine

three bond cuts

3 + 2 + 1

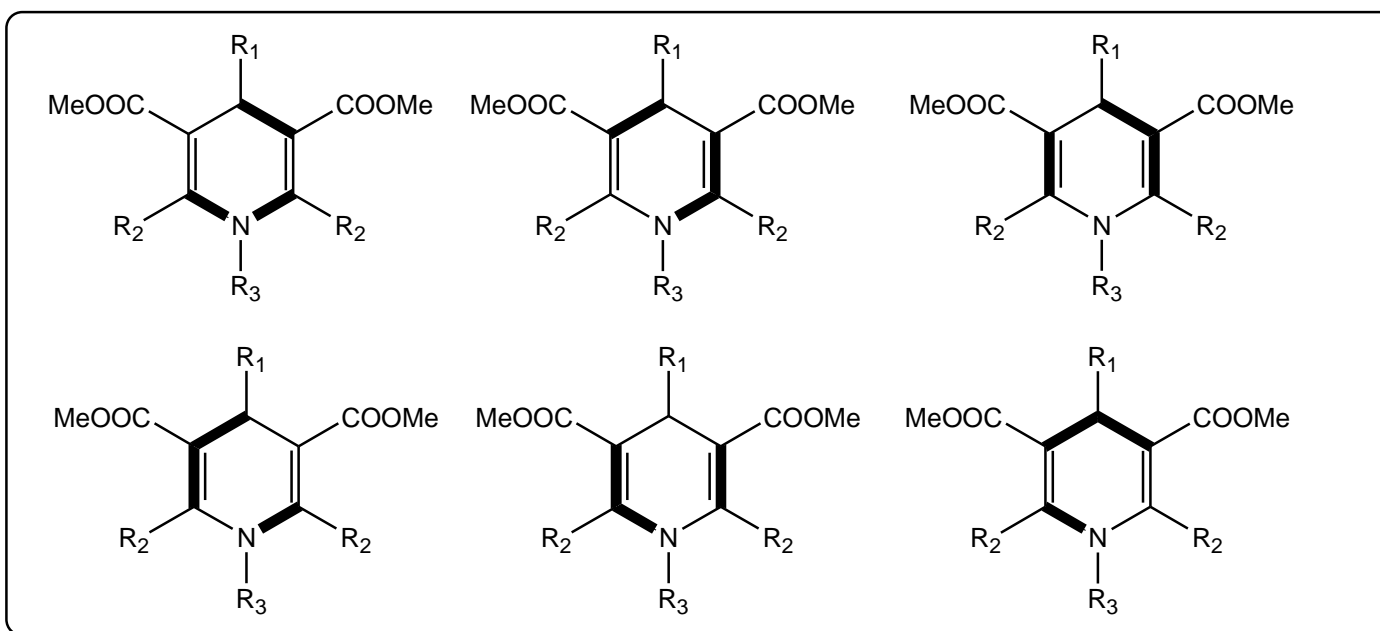

Schemes S14b. Superposition of [3 + 2 + 1] 3-partition templates for Hantzsch dihydropyridine.

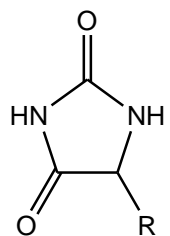

hydantoin

three bond cuts

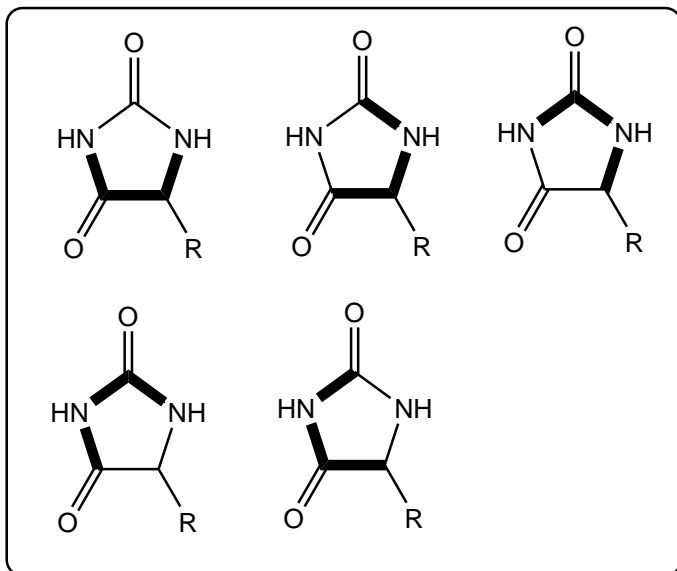

[3 + 1 + 1]

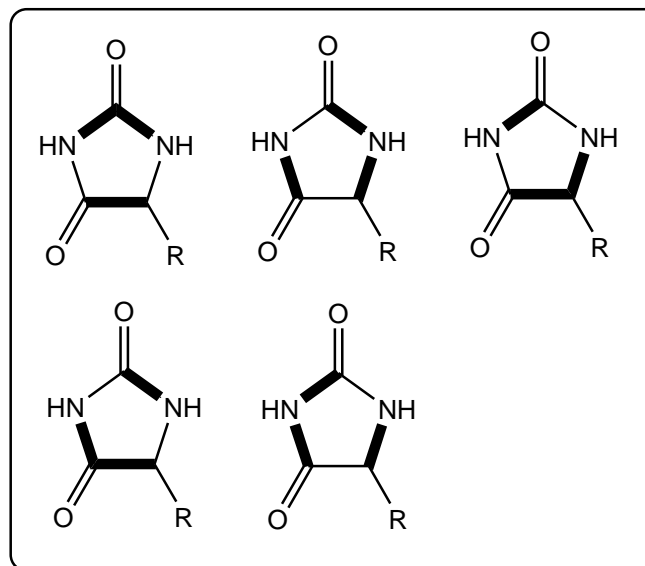

[2 + 2 + 1]

Schemes S15. Superposition of 3-partition templates for hydantoin.

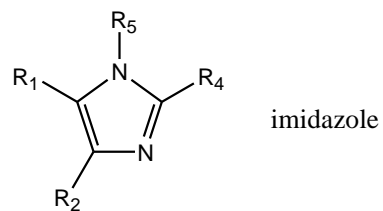

three bond cuts

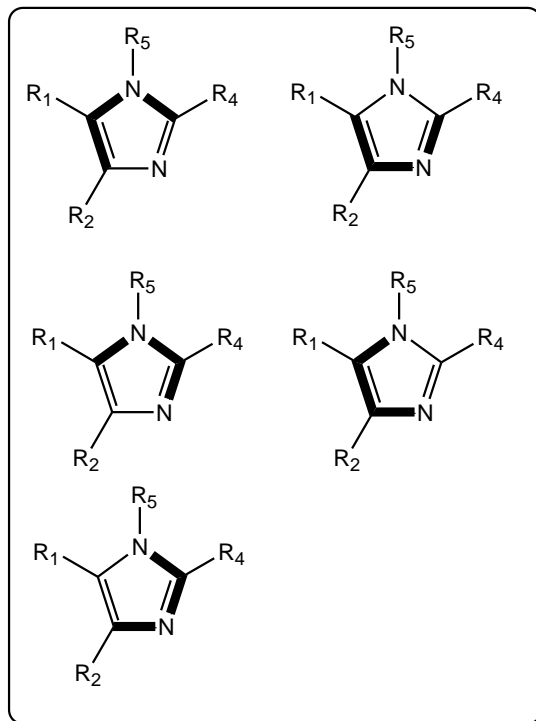

[3 + 1 + 1]

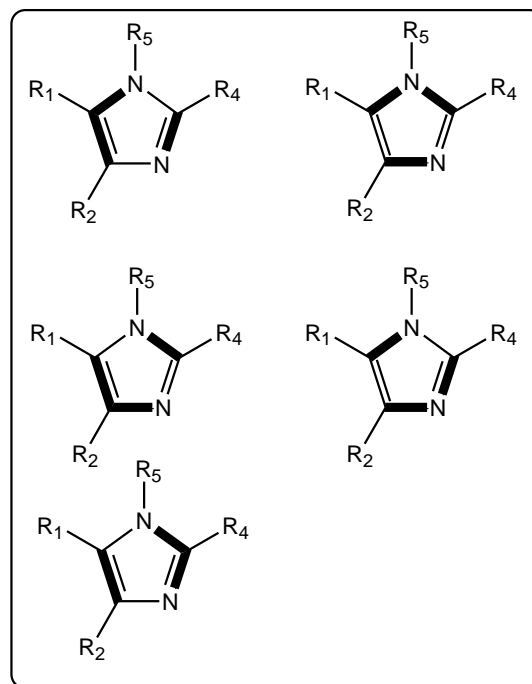

[2 + 2 + 1]

Schemes S16. Superposition of 3-partition templates for imidazole.

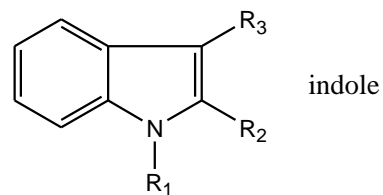

three bond cuts:

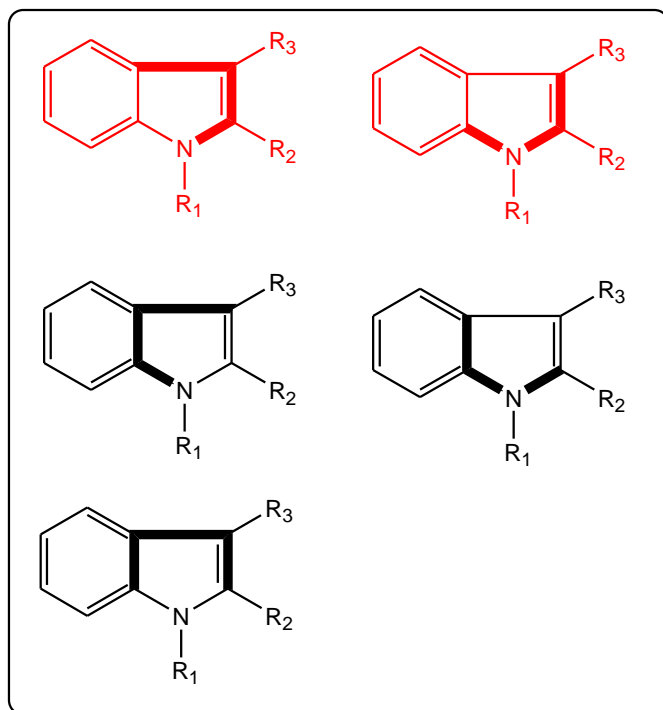

[3 + 1 + 1]

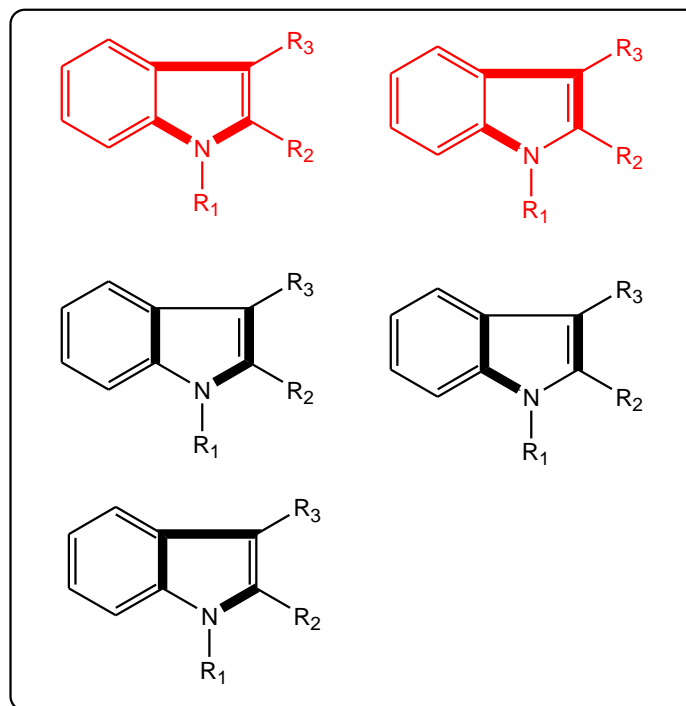

[2 + 2 + 1]

Schemes S17. Superposition of 3-partition templates for indole.

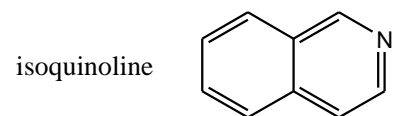

[4+1+1]

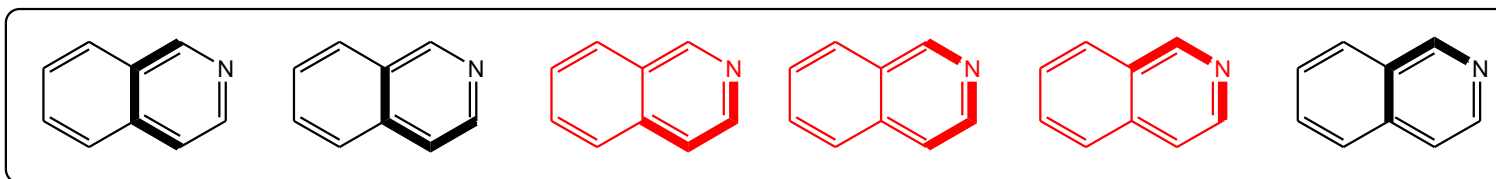

[3+2+1]

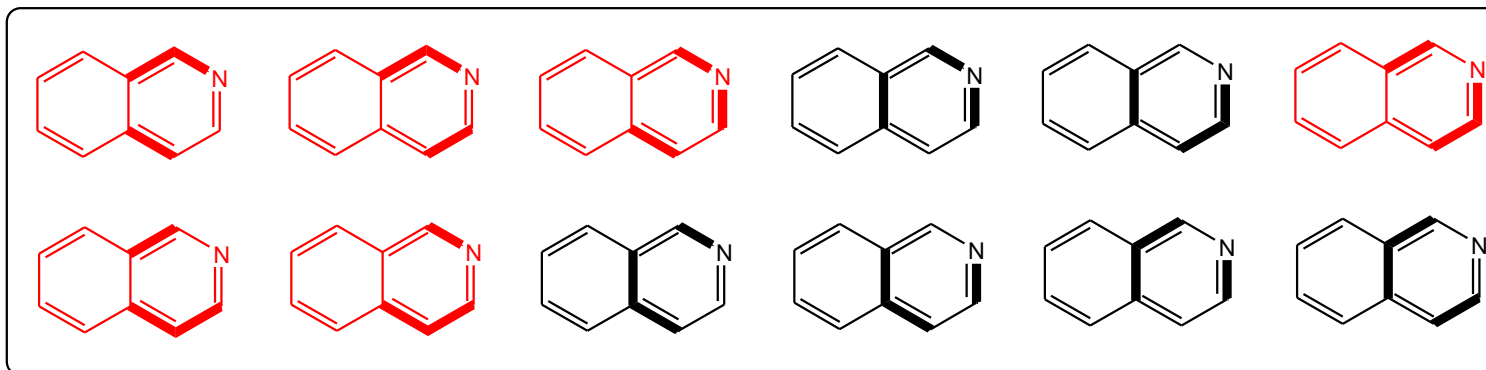

[2+2+2]

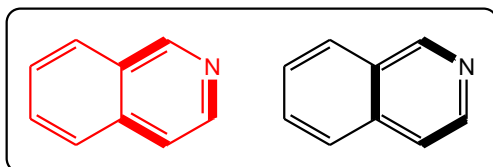

Schemes S18. Superposition of 3-partition templates for isoquinoline.

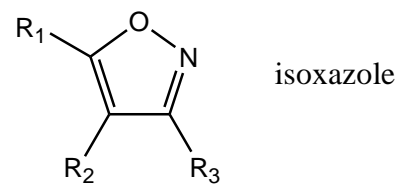

three bond cuts

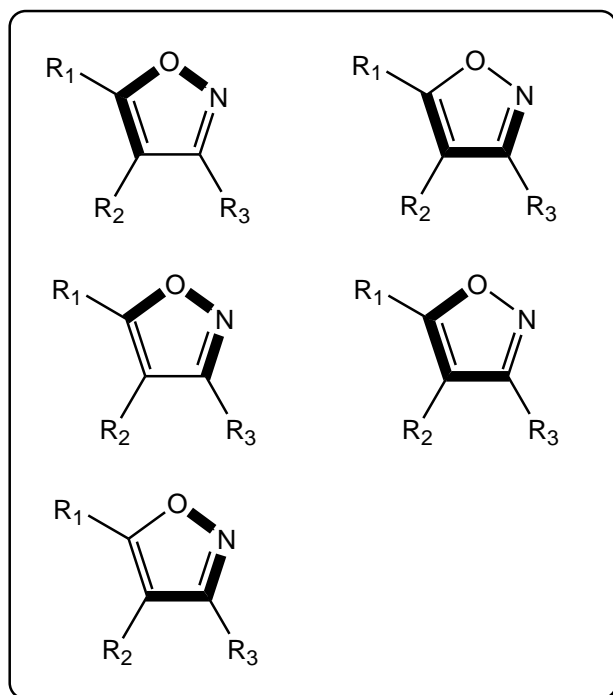

[3 + 1 + 1]

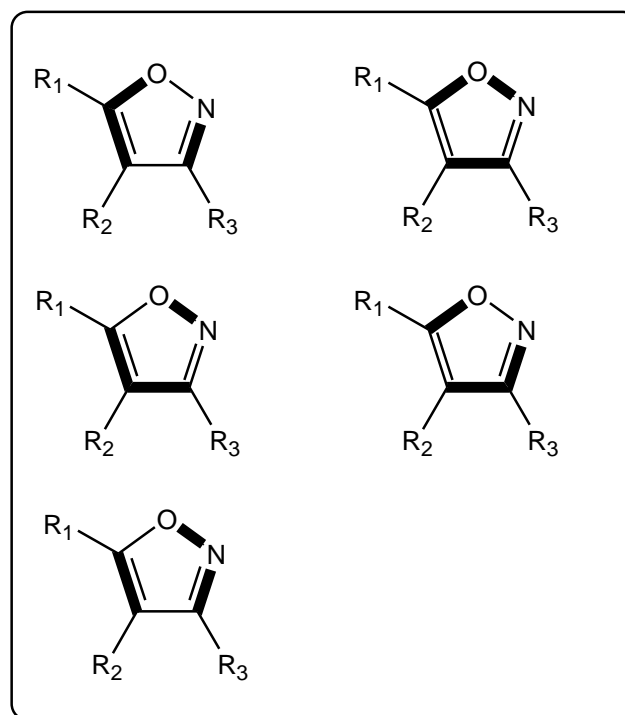

[2 + 2 + 1]

Schemes S19. Superposition of 3-partition templates for isoxazole.



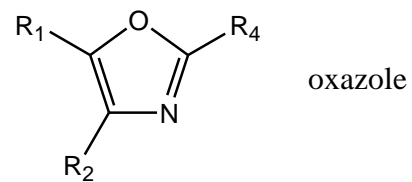

three bond cuts

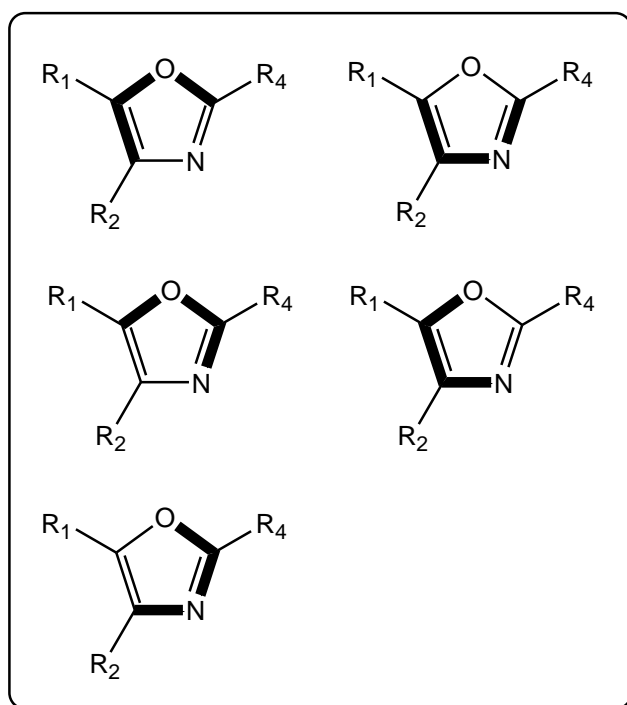

[3 + 1 + 1]

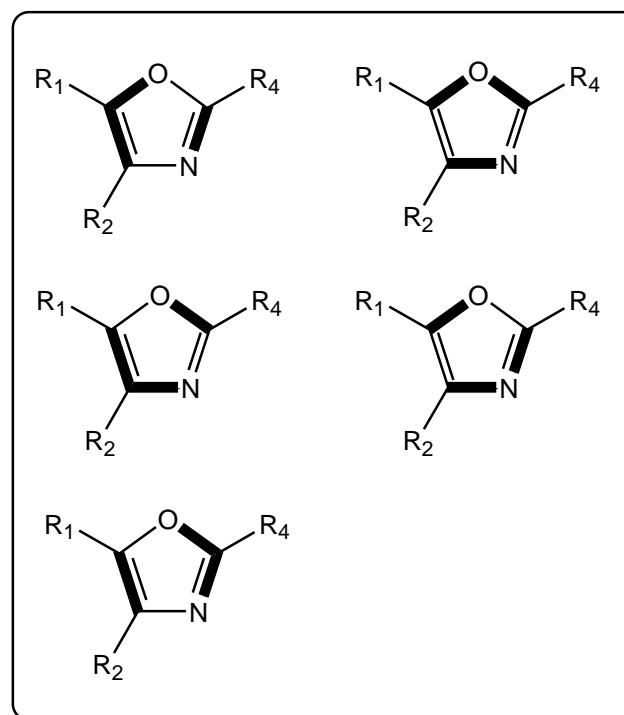

[2 + 2 + 1]

Schemes S20. Superposition of 3-partition templates for oxazole.

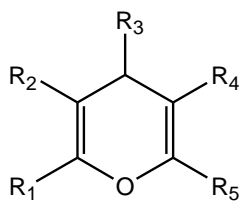4*H*-Pyran

4 + 1 + 1

2 + 2 + 2

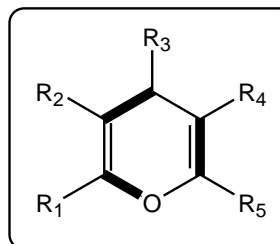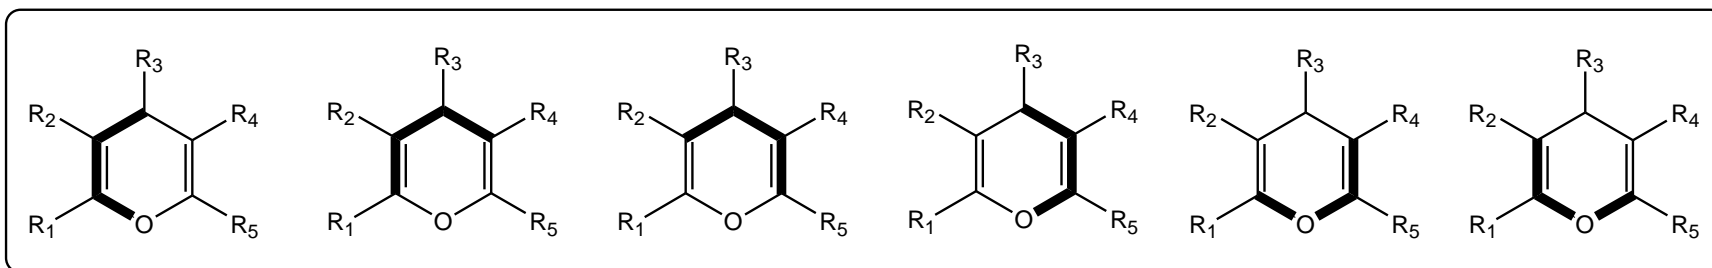

3 + 2 + 1

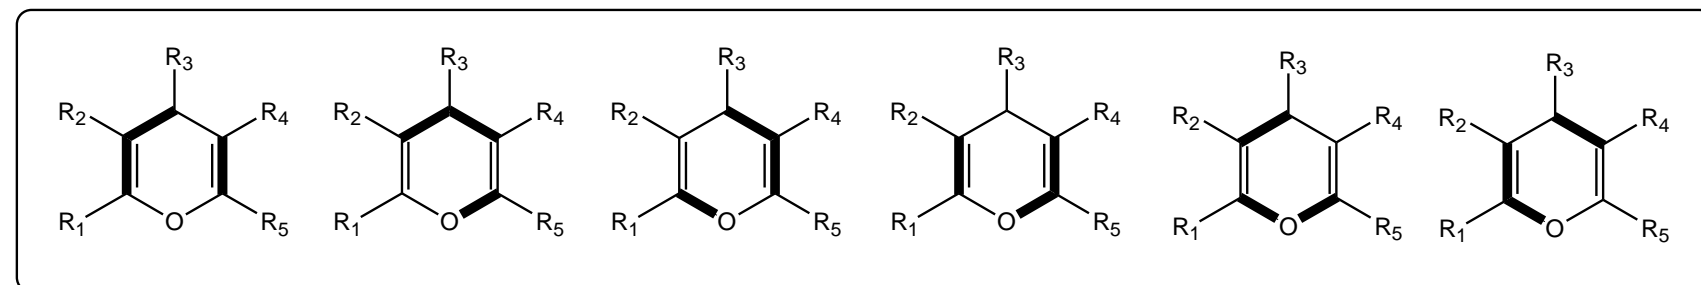

Schemes S21. Superposition of 3-partition templates for pyran.

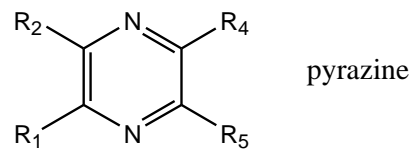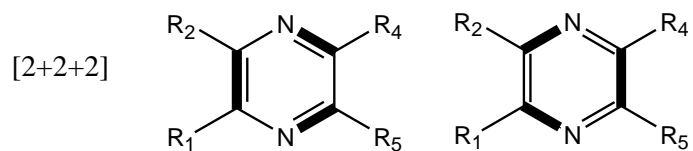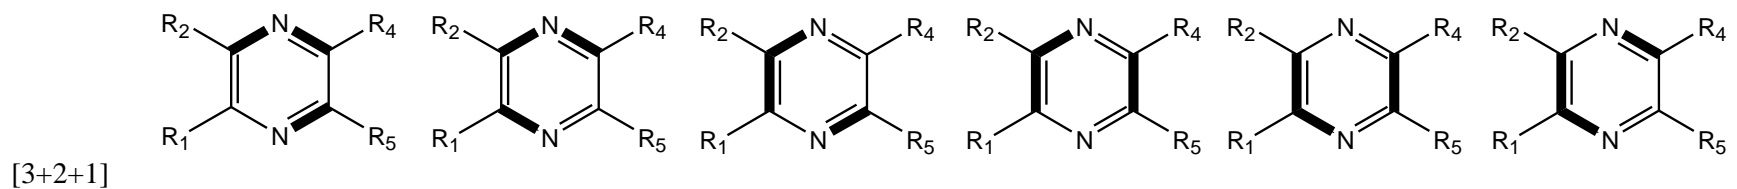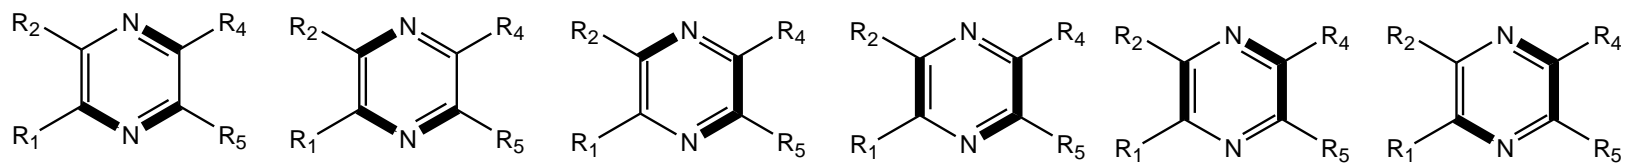

Schemes S22a. Superposition of [2 + 2 + 2] and [3 + 2 + 1] 3-partition templates for pyrazine.

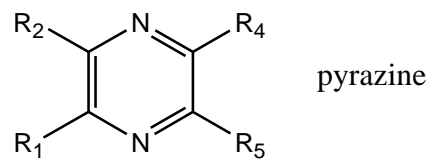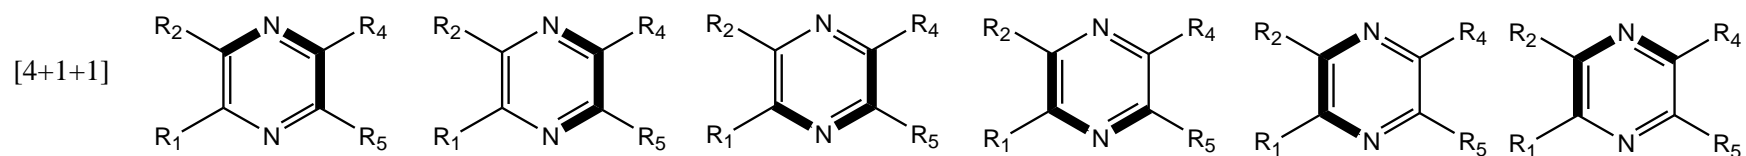

Schemes S22b. Superposition of [4 + 1 + 1] 3-partition templates for pyrazine.

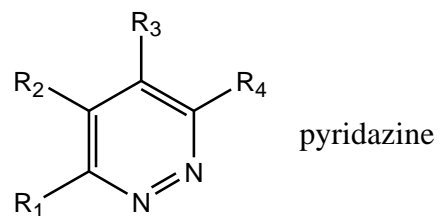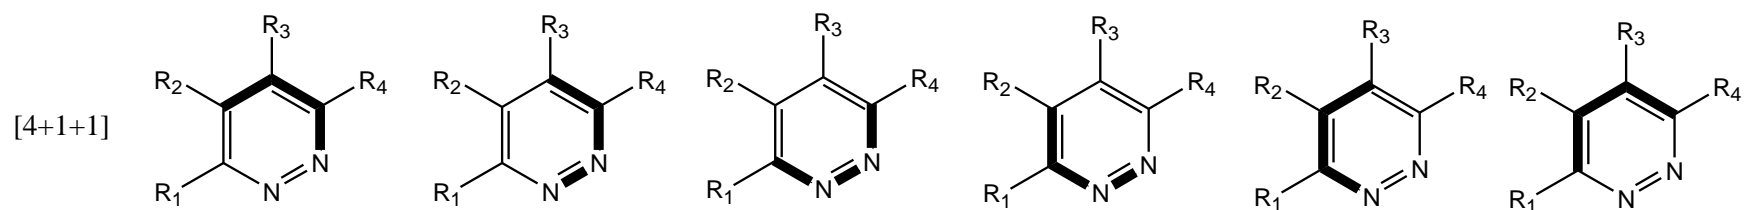

Schemes S23a. Superposition of [4 + 1 + 1] 3-partition templates for pyridazine.

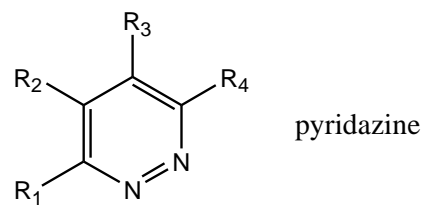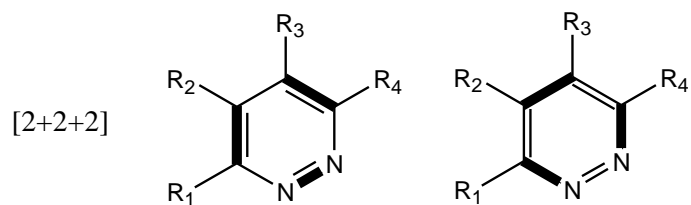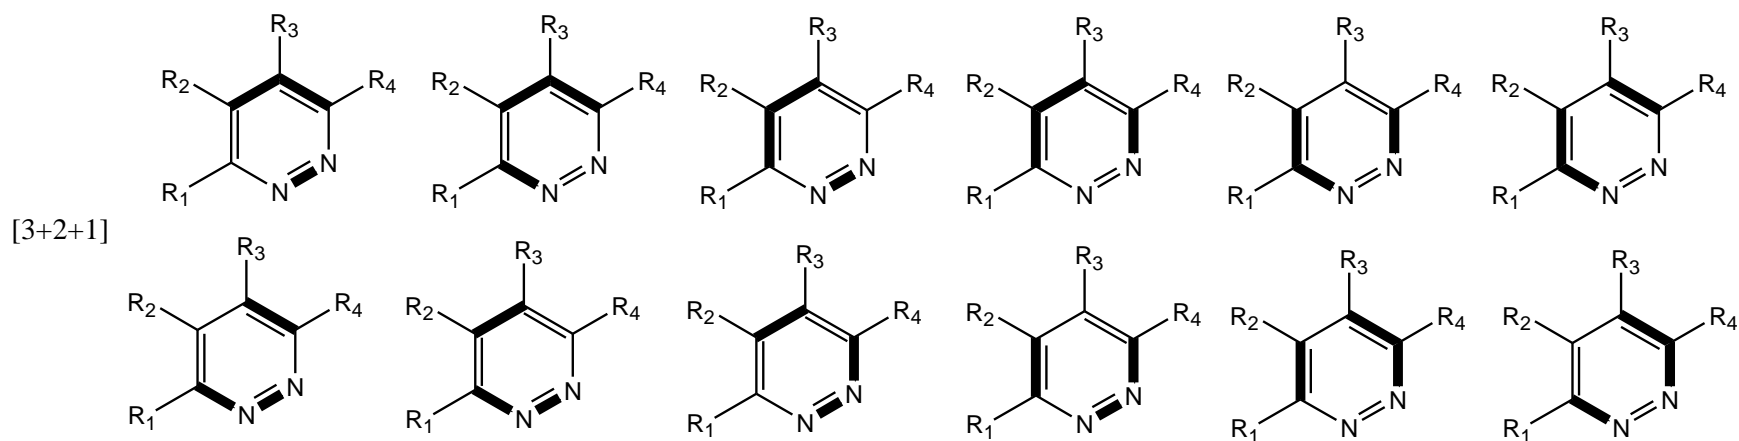

Schemes S23b. Superposition of [2 + 2 + 2] and [3 + 2 + 1] 3-partition templates for pyridazine.

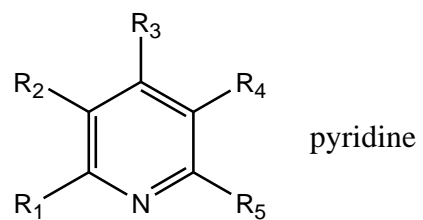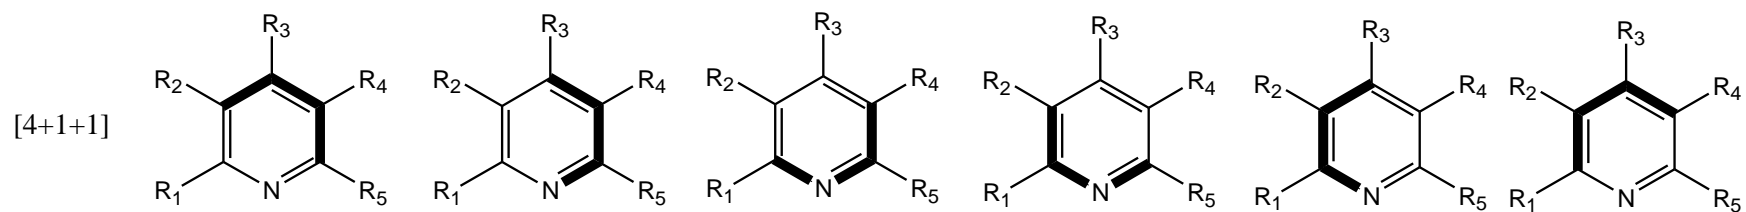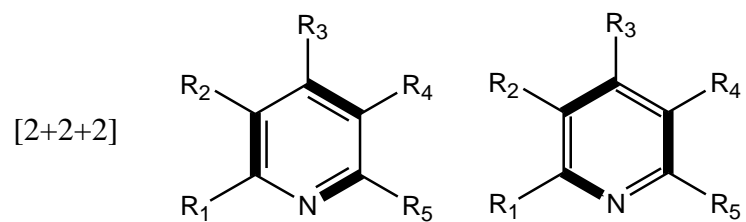

Schemes S24a. Superposition of [2 + 2 + 2] and [4 + 1 + 1] 3-partition templates for pyridine.

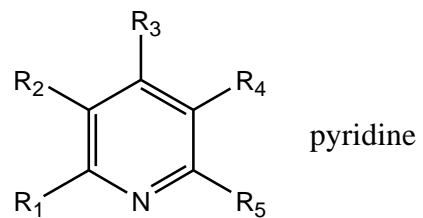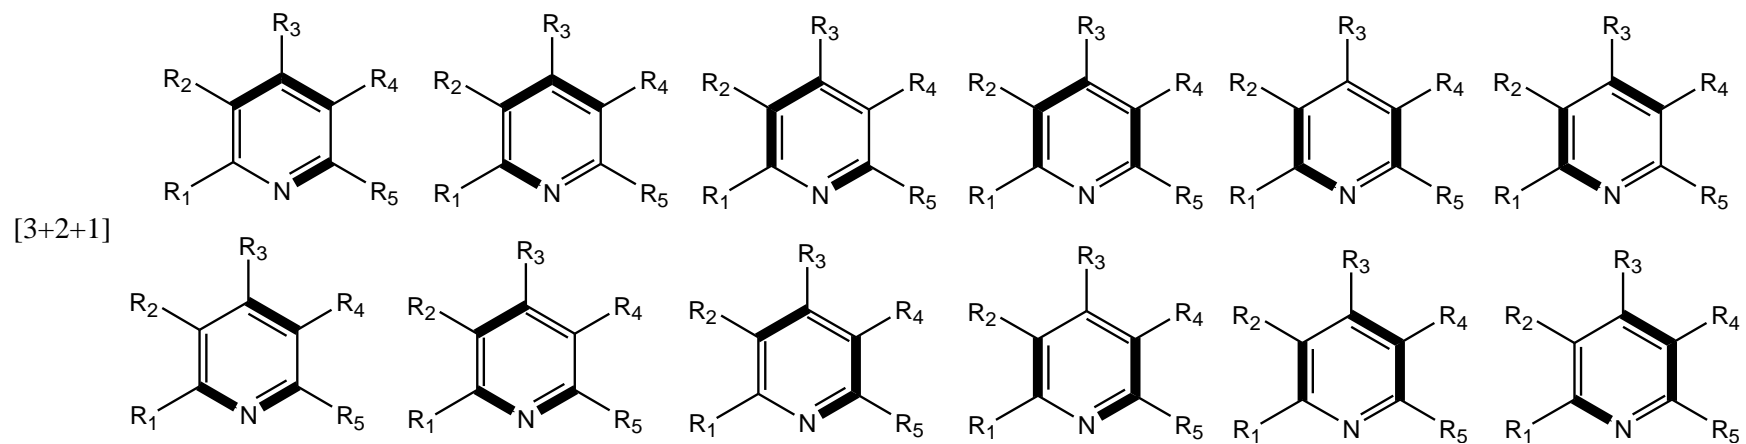

Schemes S24b. Superposition of [3 + 2 + 2] 3-partition templates for pyridine.

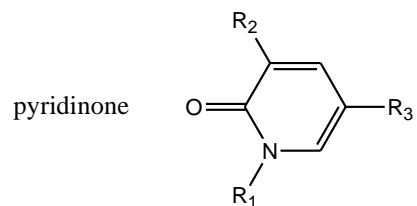

[4+1+1]

[2+2+2]

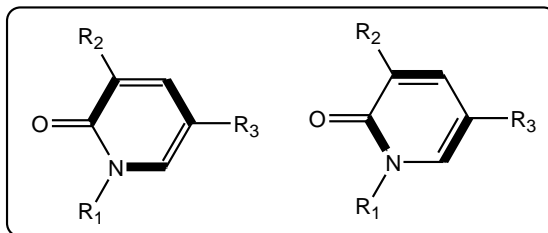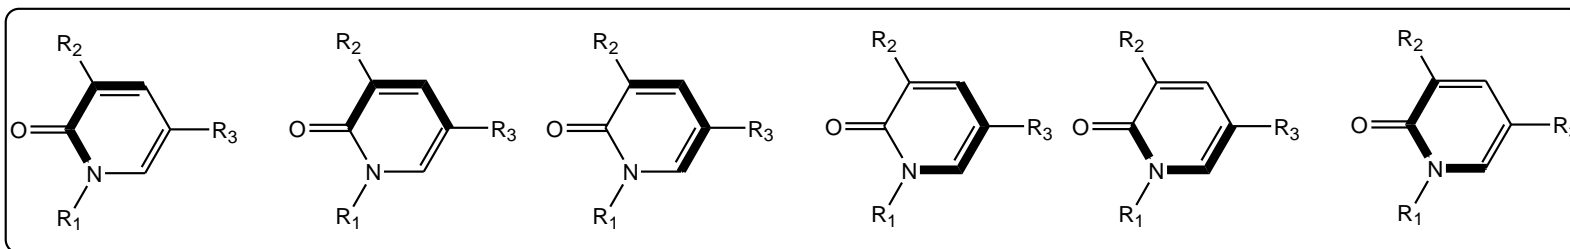

[3+2+1]

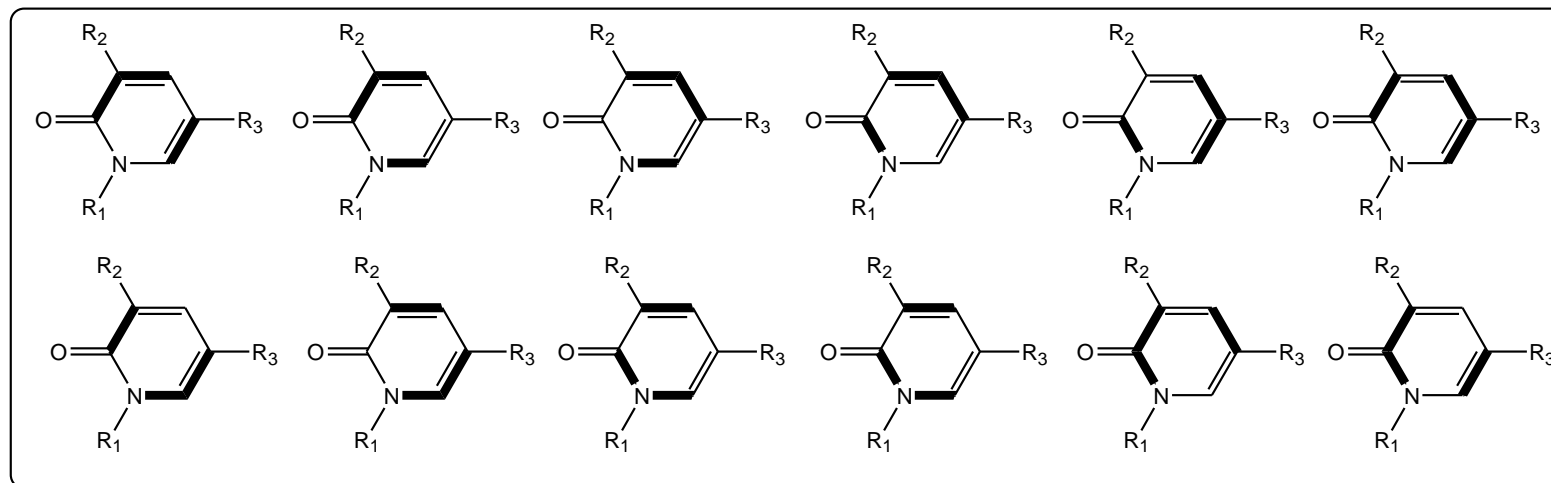

Schemes S25. Superposition of 3-partition templates for pyridinone.



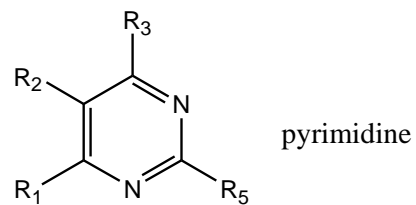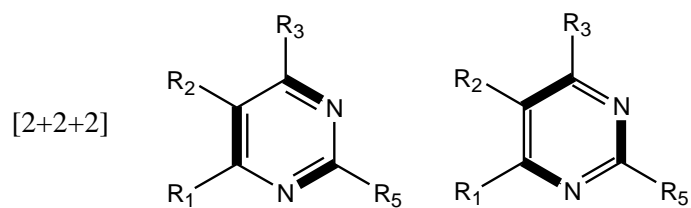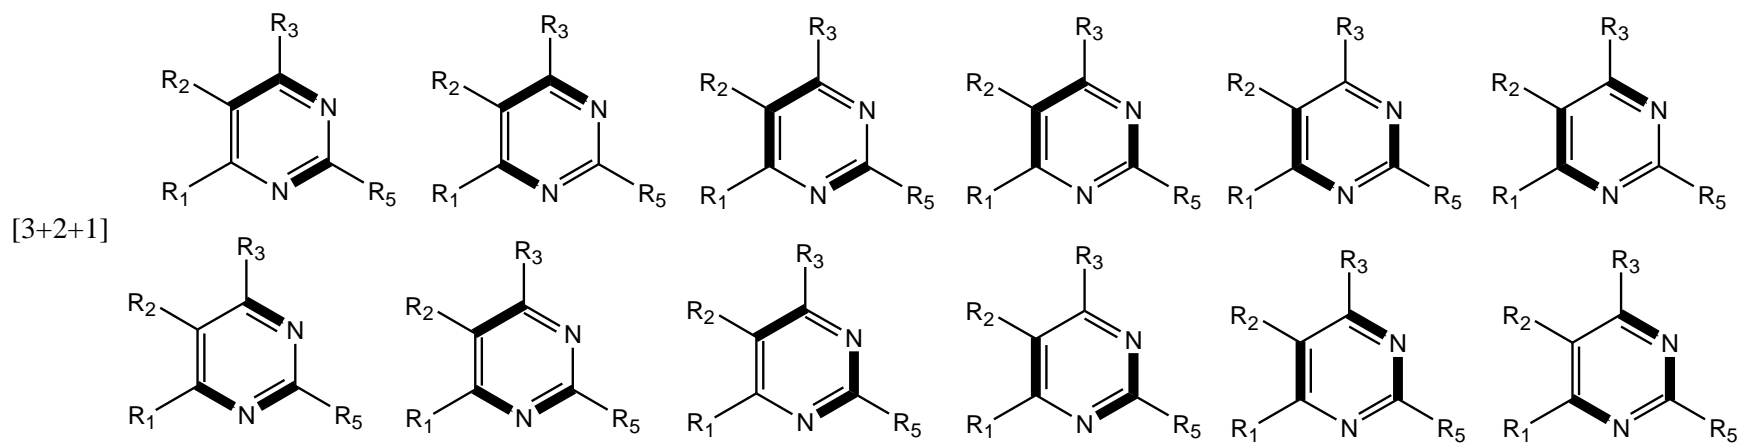

Schemes S26a. Superposition of [2 + 2 + 2] and [3 + 2 + 1] 3-partition templates for pyrimidine.

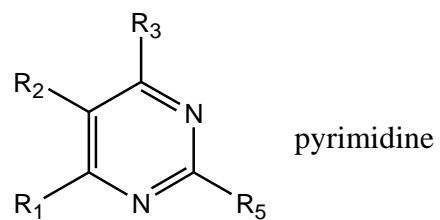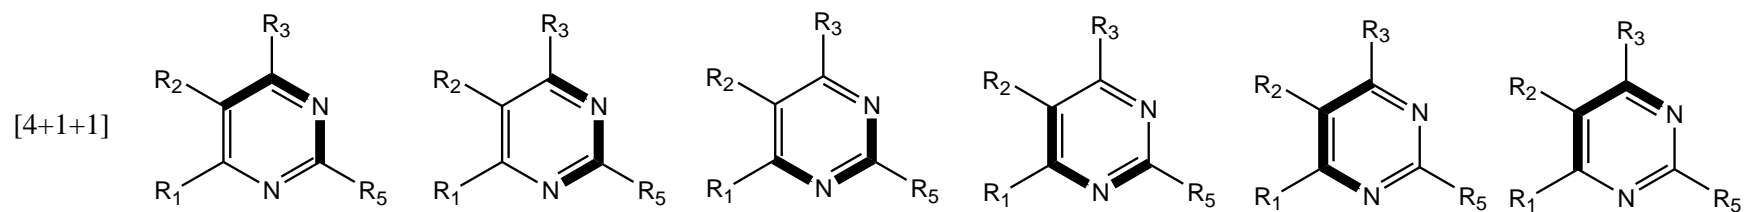

Schemes S26b. Superposition of [4 + 1 + 2] 3-partition templates for pyrimidine.

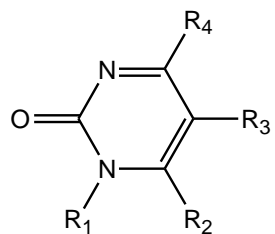

pyrimidone

[4 + 1 + 1]

[2 + 2 + 2]

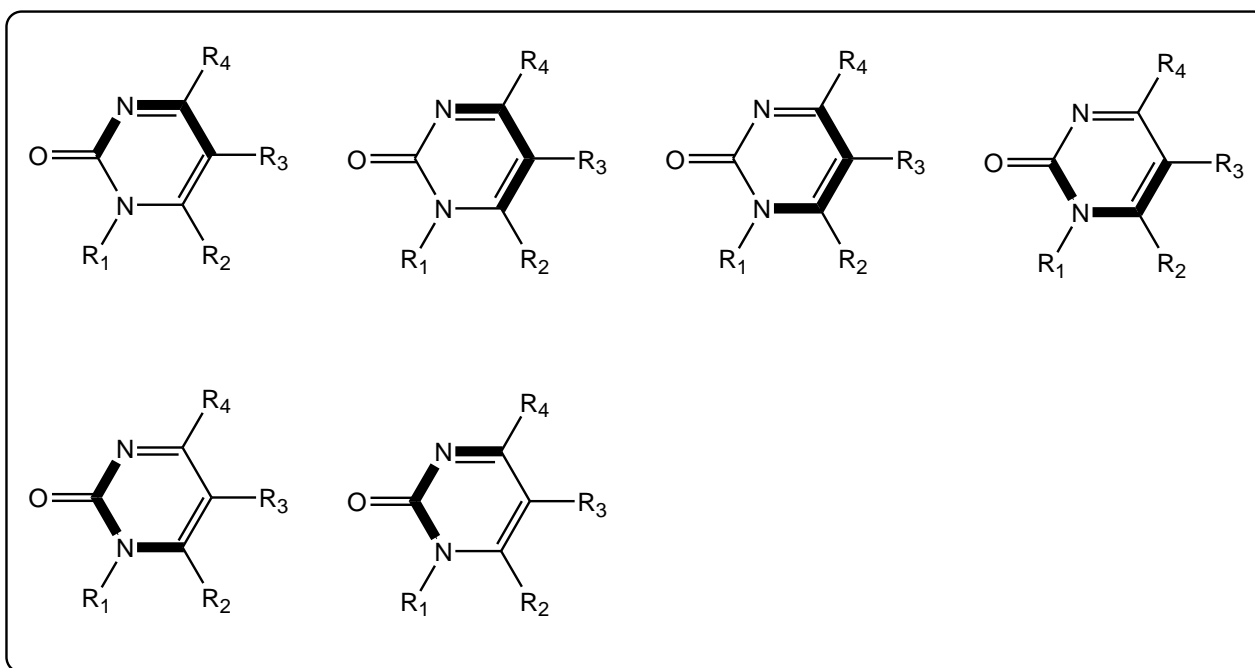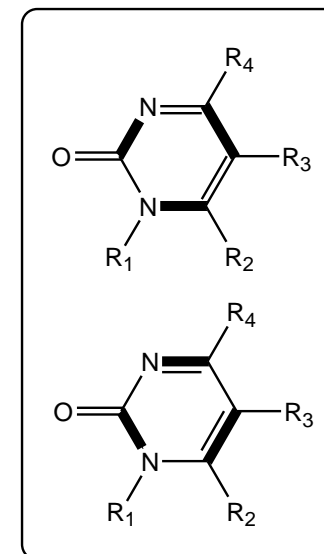

Schemes S27a. Superposition of [4 + 1 + 2] and [2 + 2 + 2] 3-partition templates for pyrimidone.

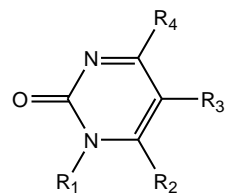

pyrimidone

[3 + 2 + 1]

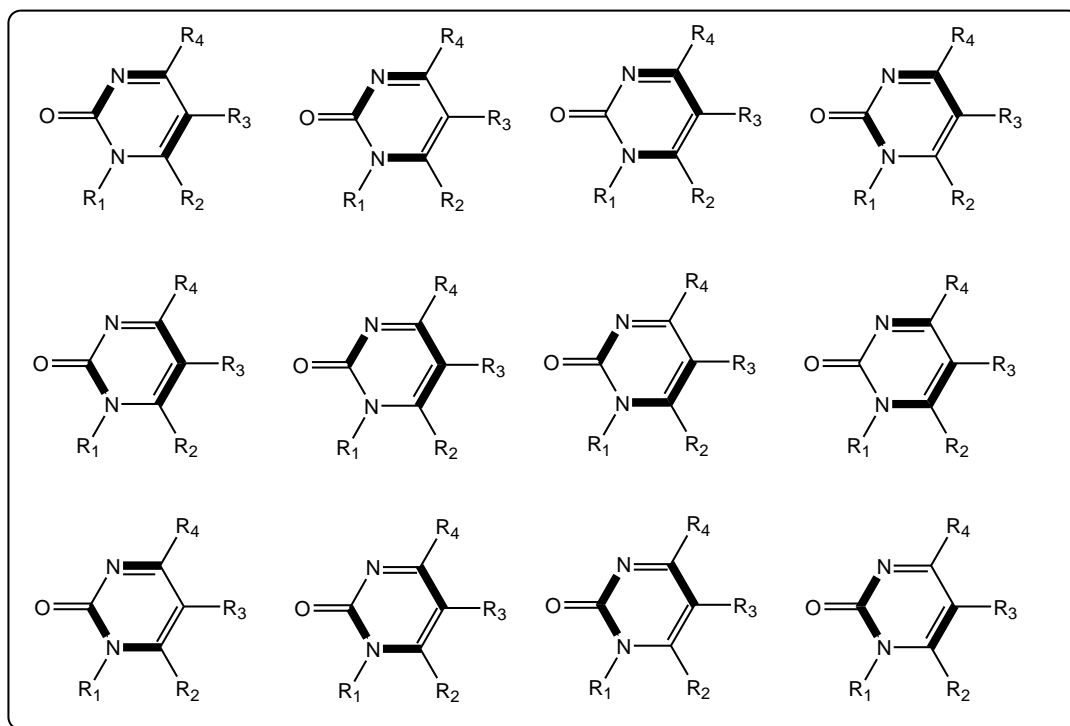

Schemes S27b. Superposition of [3 + 2 + 1] 3-partition templates for pyrimidone.

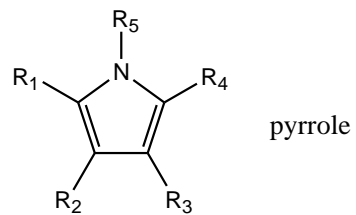

three bond cuts

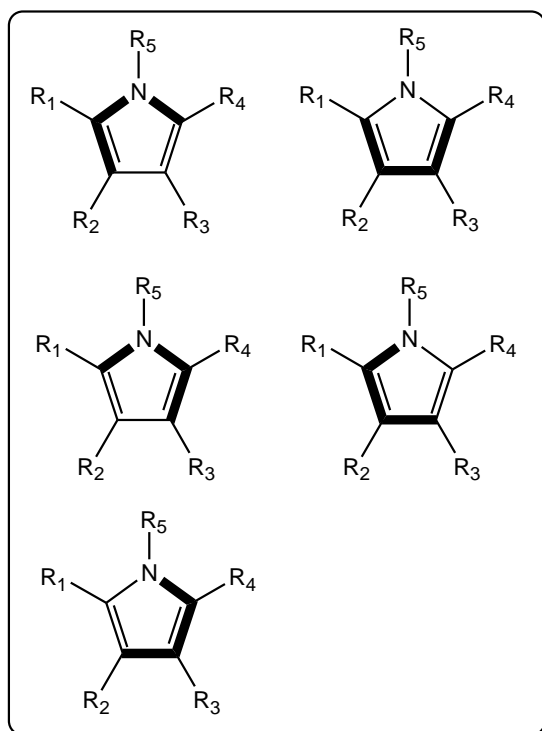

[3 + 1 + 1]

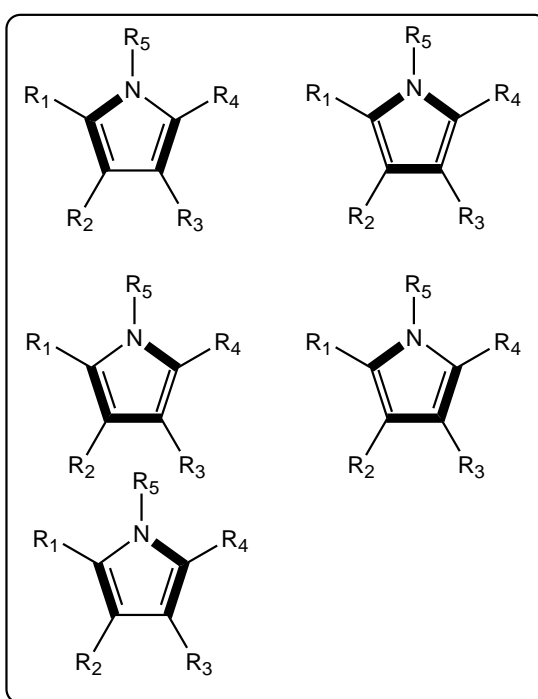

[2 + 2 + 1]

Schemes S28. Superposition of 3-partition templates for pyrrole.

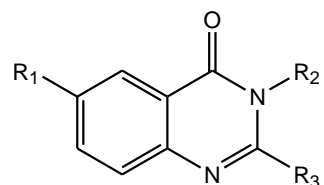

3H-Quinazolin-4-one

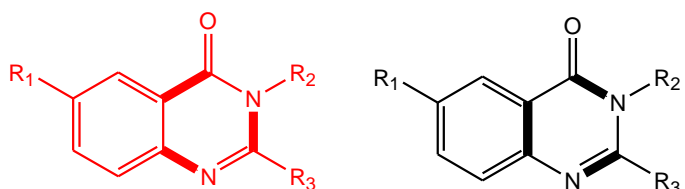

2 + 2 + 2

4 + 1 + 1

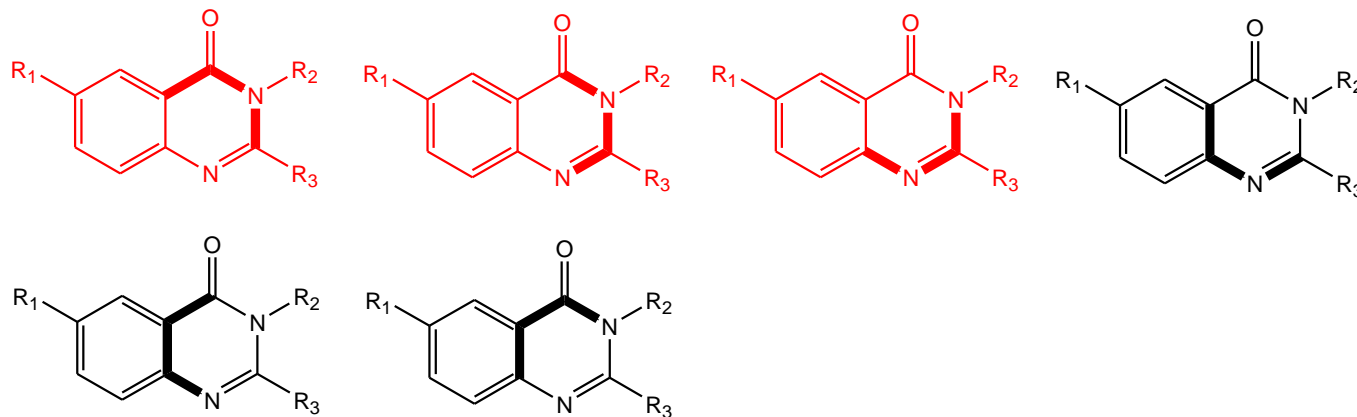

Schemes S29a. Superposition of [2 + 2 + 2] and [4 + 1 + 1] 3-partition templates for quinazolin-4-one.

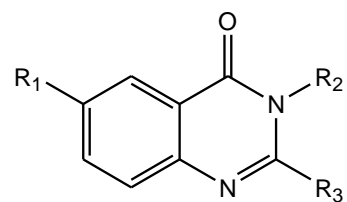3*H*-Quinazolin-4-one

3 + 2 + 1

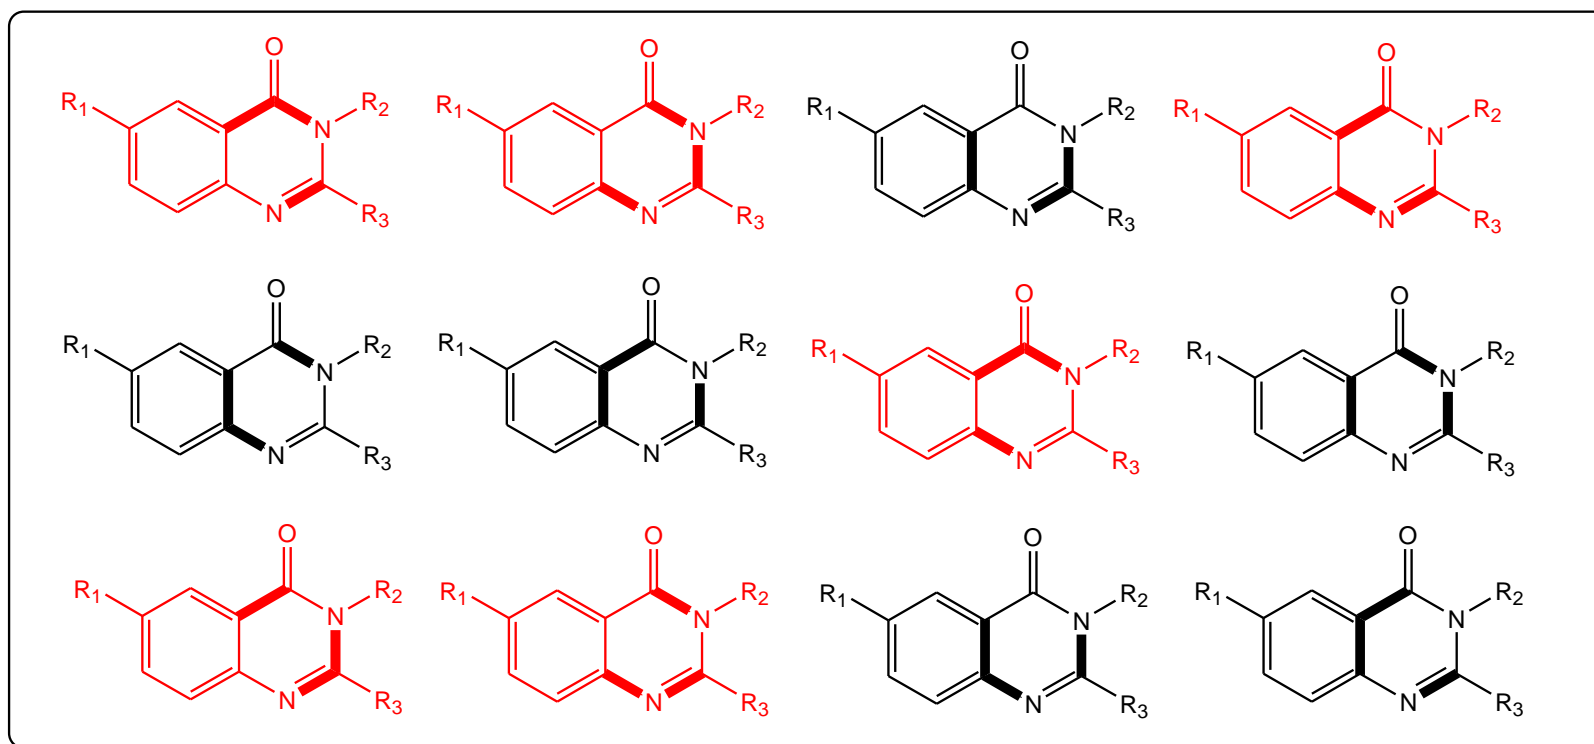

Schemes S29b. Superposition of [3 + 2 + 1] 3-partition templates for quinazolin-4-one.

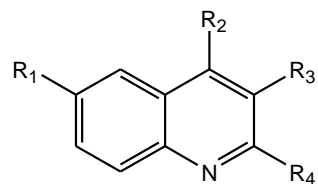

Quinoline

three bond cuts

3 + 2 + 1

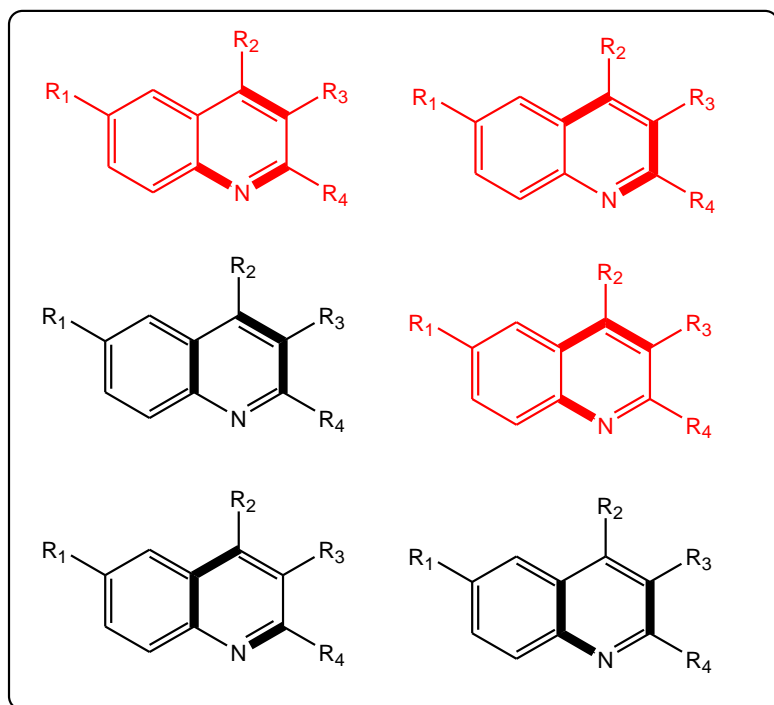

Schemes S30a. Superposition of [3 + 2 + 1] 3-partition templates for quinoline.



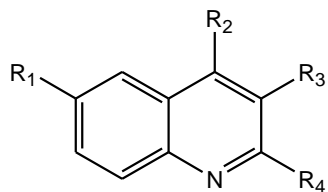

Quinoline

three bond cuts

4 + 1 + 1

2 + 2 + 2

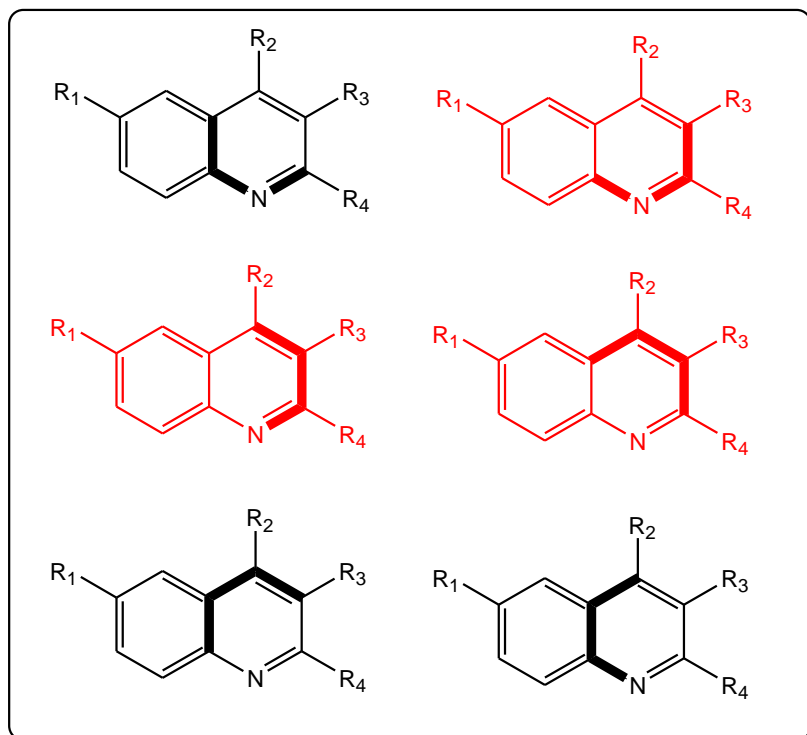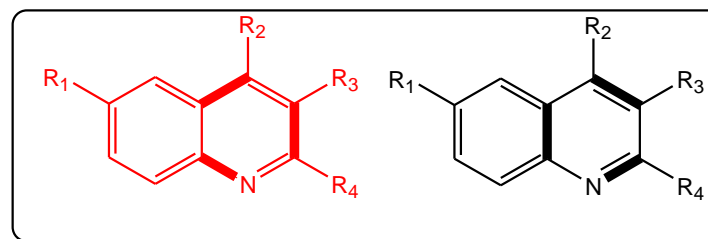

Schemes S30b. Superposition of [3 + 2 + 1] 3-partition templates for quinoline.

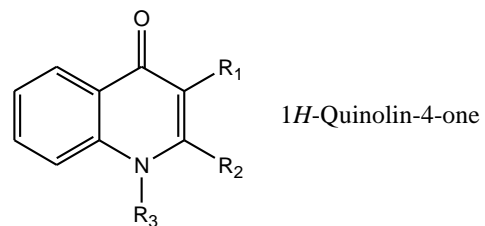
 $4 + 1 + 1$ 

three bond cuts

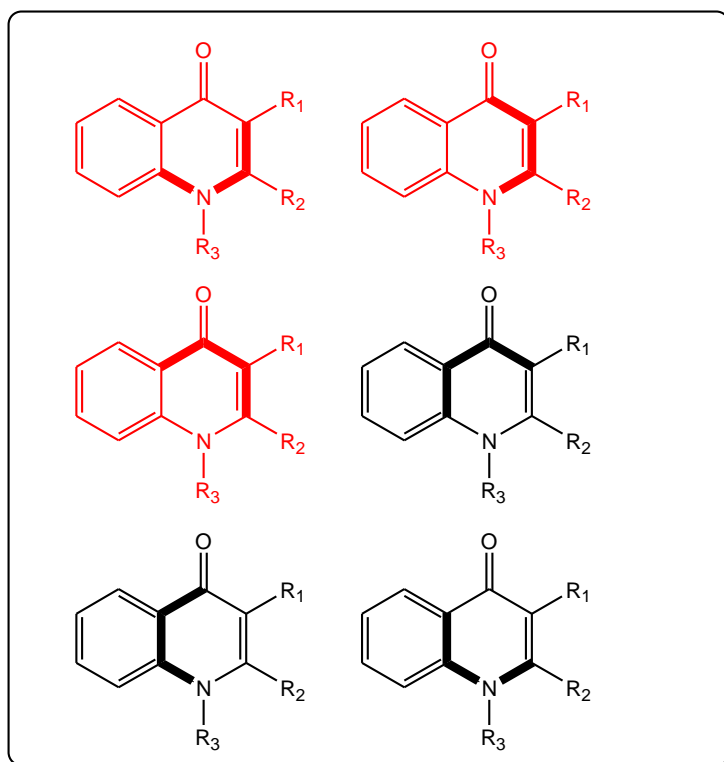

Schemes S31a. Superposition of  $[4 + 1 + 1]$  3-partition templates for quinolinone.

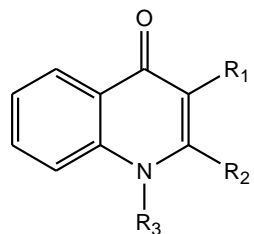1*H*-Quinolin-4-one

3 + 2 + 1

three bond cuts

2 + 2 + 2

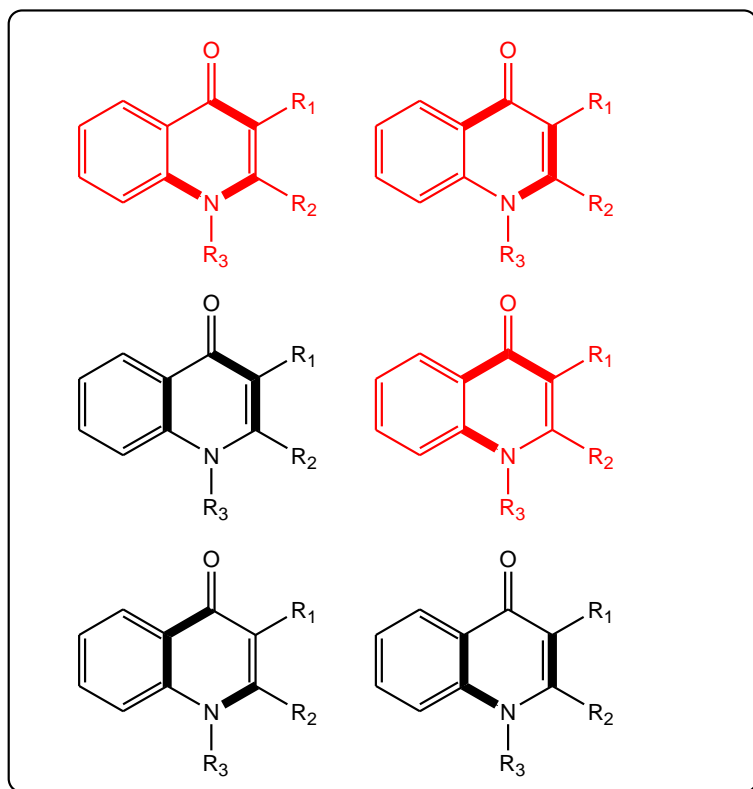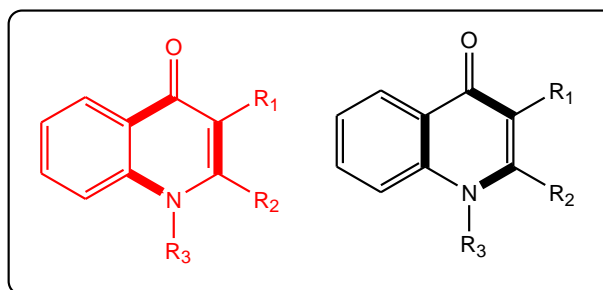

Schemes S31b. Superposition of [3 + 2 + 1] and [2 + 2 + 2] 3-partition templates for quinolinone.

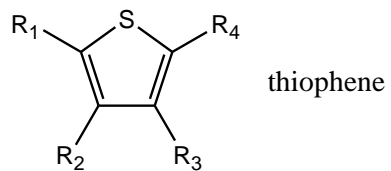

three bond cuts

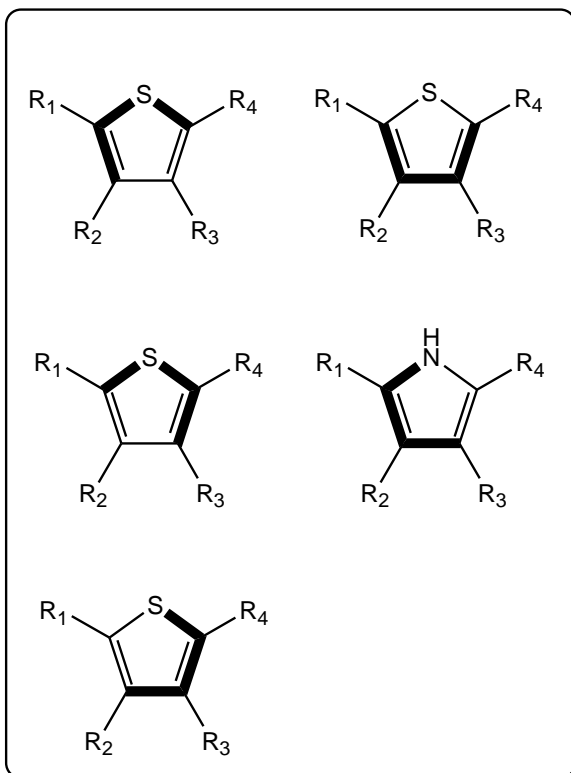

[3 + 1 + 1]

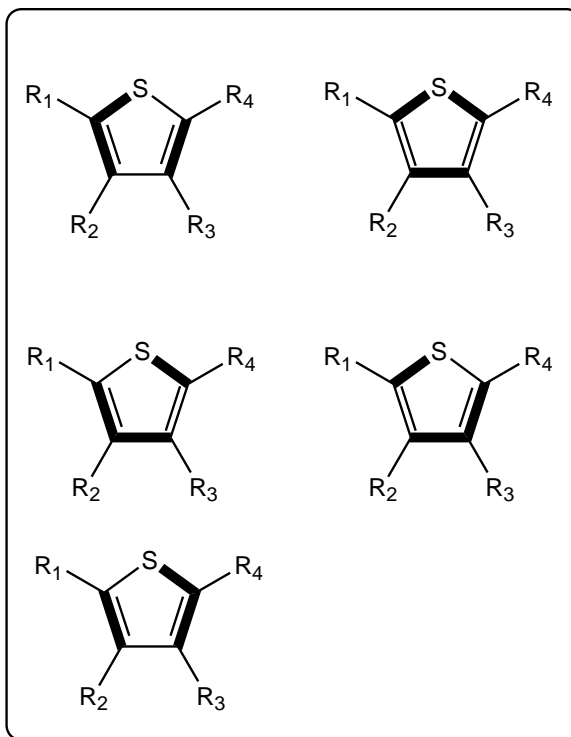

[2 + 2 + 1]

Schemes S32. Superposition of 3-partition templates for thiophene.
